1 **TP53-mediated clonal hematopoiesis confers increased risk for**  
2 **incident peripheral artery disease**  
3

4 Seyedeh M. Zekavat BS<sup>1-4\*</sup>, Vanesa Viana-Huete PhD<sup>5\*</sup>, María A. Zuriaga PhD<sup>5</sup>, Md Mesbah  
5 Uddin PhD<sup>3,4</sup>, Mark Trinder BS<sup>3,4,6</sup>, Kaavya Paruchuri MD<sup>3,4,7</sup>, Nuria Matesanz PhD<sup>5</sup>, Virginia  
6 Zorita BS MSc<sup>5</sup>, Alba Ferrer-Pérez BS MSc<sup>5</sup>, Marta Amorós-Pérez BS MSc<sup>5</sup>, Scott M.  
7 Damrauer MD<sup>8</sup>, Christie M. Ballantyne MD<sup>9</sup>, Abhishek Niroula PhD<sup>3,10</sup>, Christopher J. Gibson  
8 MD<sup>10</sup>, James Pirruccello MD<sup>3</sup>, Gabriel Griffin MD<sup>11</sup>, Benjamin L. Ebert MD PhD<sup>12</sup>, Peter Libby  
9 MD PhD<sup>7</sup>, Valentín Fuster MD PhD<sup>5,13</sup>, Hongyu Zhao PhD<sup>14</sup>, Pradeep Natarajan MD  
10 MMSc<sup>3,4,7§</sup>, Alexander G. Bick MD PhD<sup>3,15§</sup>, José J Fuster PhD<sup>5,16§</sup>, Derek Klarin MD<sup>3,17,18§</sup>

- 11  
12 1. Yale School of Medicine, New Haven, CT;  
13 2. Computational Biology & Bioinformatics Program, Yale University, New Haven, CT, USA;  
14 3. Program in Medical and Population Genetics, Broad Institute of MIT and Harvard, Cambridge, MA, USA;  
15 4. Cardiovascular Research Center, Massachusetts General Hospital, Boston, MA, USA;  
16 5. Centro Nacional de Investigaciones Cardiovasculares (CNIC), Madrid, Spain;  
17 6. Center for Heart Lung Innovation, University of British Columbia, Vancouver;  
18 7. Department of Medicine, Harvard Medical School, Boston, MA, USA;  
19 8. Department of Surgery, Perelman School of Medicine, University of Pennsylvania, Philadelphia, PA, USA;  
20 9. Center for Cardiometabolic Disease Prevention, Baylor College of Medicine, Houston, TX, USA;  
21 10. Department of Medical Oncology, Dana-Farber Cancer Institute, Boston, MA, USA;  
22 11. Department of Pathology, Brigham and Women's Hospital, Boston, MA, USA;  
23 12. Department of Hematology, Brigham and Women's Hospital, Boston, MA, USA;  
24 13. Icahn School of Medicine at Mount Sinai, New York, NY, USA;  
25 14. Department of Biostatistics, Yale School of Public Health, New Haven, CT;  
26 15. Division of Genetic Medicine, Department of Medicine, Vanderbilt University Medical Center, TN, USA;  
27 16. CIBER en Enfermedades Cardiovasculares (CIBER-CV), Madrid, Spain;  
28 17. Malcolm Randall VA Medical Center, Gainesville, FL;  
29 18. Division of Vascular Surgery, University of Florida College of Medicine, FL, USA

30  
31 \* Co-first authors

32 § Equally supervised this work

33  
34 Corresponding Authors:

35 Jose J. Fuster, PhD

36 [jjfuster@cnic.es](mailto:jjfuster@cnic.es)

37 Melchor Fernández Almagro, 3

38 28029 - Madrid (Spain)

39 Tel: (+34) 914531200, ext 4304

40 Fax: (+34) 914531265

41 Twitter: @josejfuster

42 ORCID: 0000-0002-5970-629X

43 Derek Klarin, MD

44 [derek.klarin@surgery.ufl.edu](mailto:derek.klarin@surgery.ufl.edu)

45 1600 SW Archer Road, NG-45, PO Box 100128, Gainesville, FL 32610

46 Tel: 352-273-5485

47 Fax: 352-273-5515

48 ORCID: 0000-0002-4636-5780  
49

50 **Main Text Total word count: 3,517**

51 **Funding:** P.N. is supported by a Hassenfeld Scholar Award from the Massachusetts General  
52 Hospital, grants from the National Heart, Lung, and Blood Institute (R01HL1427,  
53 R01HL148565, and R01HL148050), and from Fondation Leducq (TNE-18CVD04). S.M.Z is  
54 supported by the NIH National Heart, Lung, and Blood Institute (1F30HL149180-01) and the  
55 NIH Medical Scientist Training Program Training Grant (T32GM136651). A.G.B. is supported  
56 by a Burroughs Wellcome Fund Career Award for Medical Scientists, a NIH Director Early  
57 Independence Award (DP5-OD029586) and a NHLBI BioData Catalyst Fellowship (OT3  
58 HL147154-01). J.P.P is supported by a John S LaDue Memorial Fellowship. K.P. is supported  
59 by NIH grant 5-T32HL007208-43. J.J.F. is supported by grants RYC-2016-20026 and RTI2018-  
60 093554-A-I00) from the Spanish “Ministerio de Ciencia e Innovación”, a 2019 Leonardo Grant  
61 for Researchers and Cultural Creators from the BBVA Foundation, the European Research Area  
62 Network on Cardiovascular Diseases CHEMICAL (grant AC19/00133 from the “Spanish  
63 Instituto de Salud Carlos III”) and the Leducq Foundation (TNE-18CVD04). The project leading  
64 to these results received funding from “la Caixa” Foundation (ID 100010434), under agreement  
65 HR17-00267. The Centro Nacional de Investigaciones Cardiovasculares (CNIC) is supported by  
66 the Instituto de Salud Carlos III (ISCIII), the Ministerio de Ciencia e Innovación and the Pro  
67 CNIC Foundation. P.L. receives funding support from the National Heart, Lung, and Blood  
68 Institute (1R01HL134892), the American Heart Association (18CSA34080399), the RRM  
69 Charitable Fund, and the Simard Fund.

70  
71 **Disclosures:** P.N. reported grants from Amgen during the conduct of the study and grants from  
72 Boston Scientific; grants and personal fees from Apple; personal fees from Novartis and  
73 Blackstone Life Sciences; and spousal employment at Vertex all outside the submitted work.  
74 P.L. is an unpaid consultant to, or involved in clinical trials for Amgen, AstraZeneca, Baim  
75 Institute, Beren Therapeutics, Esperion, Therapeutics, Genentech, Kancera, Kowa  
76 Pharmaceuticals, Medimmune, Merck, Norvo Nordisk, Merck, Novartis, Pfizer, Sanofi-  
77 Regeneron. Dr. Libby is a member of scientific advisory board for Amgen, Corvidia  
78 Therapeutics, DalCor Pharmaceuticals, Kowa Pharmaceuticals, Olatec Therapeutics,  
79 Medimmune, Novartis, and XBiotech, Inc. P.L.'s laboratory has received research funding in the  
80 last 2 years from Novartis, he is on the Board of Directors of XBiotech, Inc, and has a financial  
81 interest in Xbiotech, a company developing therapeutic human antibodies. These interests were  
82 reviewed and are managed by Brigham and Women's Hospital and Partners HealthCare in  
83 accordance with their conflict of interest policies. The other authors do not report any  
84 disclosures.

85  
86 **Acknowledgments:** Thanks to the participants and staff of the UK Biobank and Mass General  
87 Brigham Biobank. UK Biobank analyses were conducted using Application 7089. Thanks to Dr.  
88 Zeyan Liew and teaching fellow Jiajun Lu, the instructors of the causal inference course at Yale.

89  
90 **Abbreviations:** CHIP, clonal hematopoiesis of indeterminate potential; PAD, peripheral artery  
91 disease

92 **Abstract**

93 **Background:** Somatic mutations in blood indicative of clonal hematopoiesis of indeterminate  
94 potential (CHIP), particularly in *DNMT3A*, *TET2*, and *JAK2*, are associated with an increased  
95 risk of hematologic malignancy, coronary artery disease, and all-cause mortality. However,  
96 whether CHIP is associated with increased risk of peripheral artery disease (PAD) remains  
97 unknown. In addition, chemotherapy frequently causes mutations in DNA Damage Repair  
98 (DDR) genes *TP53* and *PPM1D*, and whether CHIP caused by somatic mutations in DDR genes  
99 results in increased risk of atherosclerosis is unclear. We sought to test whether CHIP, and CHIP  
100 caused by DDR genes, associates with incident peripheral artery disease (PAD) and  
101 atherosclerosis.

102 **Methods:** We identified CHIP among 50,122 exome sequences in individuals from UK and  
103 Mass General Brigham Biobanks and tested CHIP status (N=2,851) with incident PAD and  
104 atherosclerosis across multiple arterial beds. To mimic the human scenario of clonal  
105 hematopoiesis and test whether the expansion of p53-deficient hematopoietic cells contributes to  
106 atherosclerosis, a competitive bone marrow transplantation (BMT) strategy was used to generate  
107 atherosclerosis-prone *Ldlr*<sup>-/-</sup> chimeric mice carrying 20% *Trp53*<sup>-/-</sup> hematopoietic cells (20%  
108 KO-BMT mice). We then evaluated aortic plaque burden and plaque macrophage accumulation  
109 12 weeks after grafting.

110 **Results:** CHIP associated with incident PAD (HR 1.7; P=2.2x10<sup>-5</sup>) and atherosclerosis in  
111 multiple beds (HR 1.3; P=9.7x10<sup>-5</sup>), with increased risk among individuals with DDR CHIP (HR  
112 2.0; P=0.0084). Among atherosclerosis-prone *Ldlr* null mice, the p53<sup>-/-</sup> 20% KO-BMT mice  
113 demonstrated increased aortic plaque size (p=0.013) and accumulation of p53<sup>-/-</sup> plaque  
114 macrophages (P<0.001), driven by an abundance of p53-deficient plaque macrophages. The

115 expansion of p53-deficient cells did not affect the expression of the pro-inflammatory cytokines  
116 IL-6 and IL-1 $\beta$  in the atherosclerotic aortic wall.

117 **Conclusions:** Our findings highlight the role of CHIP as a broad driver of atherosclerosis across  
118 the entire arterial system, with evidence of increased plaque among p53 -/- 20% KO-BMT mice  
119 via expansion of plaque macrophages. These observations provide new insight into the link  
120 between CHIP and cardiovascular disease, and lend human genetic support to the concept that  
121 post-cytotoxic chemotherapy patients may benefit from surveillance for atherosclerotic  
122 conditions in addition to therapy-related myeloid neoplasms.

123

124 Abstract Word Count: 346

125 **Key Words:** somatic, atherosclerosis, clonal hematopoiesis, sequencing

126

127

128

129

130

131

132

133

134

135

136

137

138

## 139 **Introduction**

140 Peripheral artery disease (PAD) is a leading cause of cardiovascular morbidity and mortality  
141 worldwide, and age is among its strongest risk factors. PAD associates with an extremely high  
142 cardiovascular mortality and unmitigated can progress to limb loss<sup>1</sup>. The age-related acquisition  
143 and expansion of leukemogenic mutations in hematopoietic stem cells has recently been  
144 associated with an increased risk of hematologic malignancy, coronary artery disease, and  
145 overall mortality<sup>2,3</sup>. This phenomenon, termed clonal hematopoiesis of indeterminate potential  
146 (CHIP), is relatively common in asymptomatic older adults, affecting at least 10% of individuals  
147 older than 70 years of age<sup>4</sup>. CHIP mutations most frequently occur in epigenetic regulators  
148 *DNMT3A* and *TET2*, in DNA damage repair (DDR) genes *PPM1D* and *TP53*, or cell cycle and  
149 transcriptional regulator genes *JAK2* and *ASXL1*<sup>5</sup>. CHIP associates with coronary artery disease  
150 in multiple studies<sup>2,6</sup>. Whether CHIP links with increased risk of atherosclerosis in the peripheral  
151 arterial bed (PAD) is unknown.

152 Here, we leveraged 50,122 whole exome sequences from two genetic biobanks (UK  
153 Biobank [UKB], Mass General Brigham Biobank [MGBB]) and tested whether CHIP was  
154 associated with increased risk of PAD and atherosclerosis across multiple arterial beds, and  
155 additionally whether these associations varied by putative CHIP driver gene. Based on these  
156 results, we then performed functional analyses in *Ldlr*-null mice transplanted with 20% *Trp53*<sup>-/-</sup>  
157 bone marrow cells, a murine model of atherosclerosis and clonal hematopoiesis driven by *TP53*  
158 mutations.

159

## 160 **Methods**

161 *Cohorts and exclusion criteria*

162 The UKB is a population-based cohort of approximately 500,000 participants recruited from  
163 2006-2010 with existing genomic and longitudinal phenotypic data and median 10-year follow-  
164 up<sup>7</sup>. Baseline assessments were conducted at 22 assessment centres across the UK with sample  
165 collections including blood-derived DNA. Of ~49,960 individuals with WES data available, we  
166 analyzed 37,657 participants consenting to genetic analyses after our exclusion criteria. Use of  
167 the data was approved by the Massachusetts General Hospital Institutional Review Board  
168 (protocol 2013P001840) and facilitated through UK Biobank Application 7089.

169 The MGBB contains genotypic and clinical data from >105,000 patients who consented  
170 to broad-based research across 7 regional hospitals and median 3-year follow-up<sup>8</sup>. Baseline  
171 phenotypes were ascertained from the electronic medical record and surveys. We analyzed  
172 12,465 individuals consenting to genetic analysis after our exclusion criteria. Use of the data was  
173 approved by the Massachusetts General Hospital Institutional Review Board (protocol  
174 2020P000904).

175 Across both cohorts, we excluded individuals with prevalent hematologic cancer,  
176 individuals without genotypic-phenotypic sex concordance, and one of each pair of 1<sup>st</sup> or 2<sup>nd</sup>  
177 degree relatives at random. For the UKB, samples were further restricted to individuals with  
178 Townsend deprivation index, a marker of socioeconomic status, available for analysis. Follow-up  
179 time was defined as time from enrollment to disease diagnosis for cases, or to censorship or  
180 death for controls.

181

### 182 *Whole exome sequencing and CHIP calling*

183 UKB WES were generated from whole blood-derived DNA at the Regeneron Sequencing  
184 Center<sup>9</sup>. MGBB WES were generated using whole blood-derived DNA using Illumina

185 sequencing (mean coverage 55x). Somatic CHIP variants were detected with GATK MuTect2  
186 software with parameters as previously described<sup>6, 10</sup>. Common germline variants and sequencing  
187 artifacts were excluded as before. Samples were annotated with the presence of any CHIP if  
188 MuTect2 identified one or more of a pre-specified list of pathogenic somatic variants, as  
189 previously described<sup>11, 12</sup>. Additionally, samples were annotated with the presence of Large  
190 CHIP (variant allele frequency >10%), as larger CHIP clones have previously been more  
191 strongly associated with adverse clinical outcomes<sup>6</sup>.

192

### 193 *Phenotype definitions*

194 Across both UKB and MGBB, PAD was defined by grouping together ICD-10 and ICD-9 billing  
195 codes for aortic atherosclerosis (I70), peripheral vascular disease (I73.8, I73.9), and operative  
196 procedures including amputation of leg (X09.3-5), bypass of artery of leg (L21.6, L51.3, L51.6,  
197 L51.8, L59.1-8), endarterectomy or angioplasty of leg artery (L52.1-2, L54.1,4,8, L60.1-2,  
198 L63.1,5), and other transluminal operations on leg arteries or peripheral stent placement  
199 (L63.9,L66.7), as previously described<sup>13</sup>. Additionally, in the UKB self-reported peripheral  
200 vascular disease, leg claudication/intermittent claudication, arterial embolism, femoral-popliteal  
201 leg artery bypass, leg artery angioplasty +/- stent, or amputation of leg were also incorporated  
202 (Data fields 20002, 20004) as performed previously<sup>13</sup>. Coronary artery disease and cerebral  
203 atherosclerosis phenotype definitions for each cohort are detailed in **Tables I and II in the**  
204 **supplement**. Other atherosclerotic conditions were defined using the Phecode Map 1.2<sup>14</sup> ICD-9  
205 (<https://phewascatalog.org/phecodes>) and ICD-10 ([https://phewascatalog.org/phecodes\\_icd10](https://phewascatalog.org/phecodes_icd10))  
206 phenotype groupings for “abdominal aortic aneurysm”, “aortic aneurysm”, “other aneurysm”,  
207 “chronic vascular insufficiency of intestine”, “acute vascular insufficiency of intestine”,

208 “atherosclerosis of renal artery”. The composite atherosclerosis phenotype was created by  
209 combining all analyzed atherosclerosis phenotypes (including PAD, coronary artery disease,  
210 cerebral atherosclerosis, abdominal aortic aneurysm, aortic aneurysm, other aneurysm, chronic  
211 vascular insufficiency of intestine, acute vascular insufficiency of intestine, and atherosclerosis  
212 of renal artery) into one phenotype, whereby the first instance across all of these phenotypes was  
213 used to determine time of first diagnosed atherosclerotic disease for survival analysis. Other  
214 phenotypic covariates (never/prior/current smoking status, hypertension, hyperlipidemia,  
215 principal components of ancestry, etc.) were used as previously defined<sup>15</sup>.

216

### 217 *Association Analysis*

218 In the UKB and MGBB a traditional cox-proportional hazards model was utilized using the  
219 Survival package in R-3.5 adjusting for age, age<sup>2</sup>, sex, smoking status, normalized Townsend  
220 deprivation index as a marker of socioeconomic status (only available in UKB), and the first ten  
221 principal components of genetic ancestry. Demographic and clinical characteristics found to  
222 differ between individuals with and without CHIP were tested using chi-squared (categorical)  
223 and Wilcoxon-rank sum (continuous) tests with a two-tailed  $P < 0.05$  determining significance.  
224 Sensitivity analysis including other covariates (normalized BMI, prevalent hypertension,  
225 prevalent Type 2 diabetes, and prevalent hyperlipidemia) was not found to significantly change  
226 associations with PAD in the UKB (**Figure I in the supplement**). Additional sensitivity  
227 analyses were utilized in the UKB including propensity score adjustment, as well as a marginal  
228 structural cox proportional hazards model estimated through stabilized inverse-probability-  
229 treatment-weight (IPTW)<sup>16</sup> to estimate the total causal effect of CHIP on PAD. Further details of  
230 propensity score methods and stabilized IPTW analysis are described in the supplementary



231 appendix. For our primary outcome PAD, results were combined across the UKB and MGBB  
232 using an inverse-variance weighted fixed effects meta-analysis, a two tailed association  $P < 0.05$   
233 determined statistical significance. In our secondary analysis of CHIP with 10 additional,  
234 incident atherosclerotic diseases, a two-tailed Bonferroni p-value threshold of  $P < 0.05/10 = 0.005$   
235 was used to declare statistical significance.

236

237 *Mice*

238 Animal experiments followed protocols approved by the Institutional Ethics Committee  
239 at the Centro Nacional de Investigaciones Cardiovasculares and conformed to EU Directive  
240 86/609/EEC and Recommendation 2007/526/EC regarding the protection of animals used for  
241 experimental and other scientific purposes, enforced in Spanish law under Real Decreto  
242 1201/2005. All mice were maintained on a 12-h light/dark schedule in a specific pathogen-free  
243 animal facility in individually ventilated cages and given food and water ad libitum. C57Bl/6J  
244 *Trp53*<sup>-/-</sup> mice were obtained from the Jackson Laboratory. *Ldlr*<sup>-/-</sup> mice carrying the CD45.1  
245 isoform of the CD45 hematopoietic antigen were generated by crossing LDLR-KO mice from  
246 the Jackson Laboratory and B6.SJL-*PtprcaPepcb*/BoyCrl mice from Charles River Laboratories.

247 *Competitive bone marrow transplantation and atherosclerosis induction in mice*

248 CD45.1+ *Ldlr*<sup>-/-</sup> recipients were transplanted with suspensions of BM cells containing 20%  
249 CD45.2+ *Trp53*<sup>-/-</sup> cells and 80% CD45.1+ *Trp53*<sup>+/+</sup> cells (20% KO-BMT mice) or 20 %  
250 CD45.2+ *Trp53*<sup>+/+</sup> cells and 80% CD45.1+ *Trp53*<sup>+/+</sup> cells (20% WT-BMT mice) similar to  
251 previous studies<sup>17</sup> (**Figure II in the supplement**). BM cells were isolated from femurs and tibias  
252 of donor mice after euthanasia. Recipient *Ldlr*<sup>-/-</sup> mice were exposed to two doses of 450 rad  
253 three hours apart. After the second irradiation, each recipient mouse was injected

254 with  $10^7$  BM cells i.v. Water was supplemented with antibiotics for 7 days before transplant and  
255 for 14 days post-transplant. Mice that did not recover full pre-irradiation body weight 28 days  
256 after transplant were excluded from further analysis. Starting four weeks after BMT, mice were  
257 fed a high fat high cholesterol (HF/HC) Western diet (Harlan-Teklad, TD.88137, Adjusted  
258 Calories Diet; 42% from fat, 0.2% cholesterol) to promote hypercholesterolemia and the  
259 development of atherosclerosis. Mice were maintained on a HF/HC diet for 9 weeks

260

### 261 *Quantification of aortic atherosclerosis burden in mice*

262 Mice were euthanized and aortas were removed after in situ perfusion with phosphate-buffered  
263 saline injected through the left ventricle of the heart. Tissue fixation was achieved by immersion  
264 in 4% paraformaldehyde in PBS overnight at 4°C. Aortic tissue was then dehydrated and  
265 embedded in paraffin for sectioning. Histological sections comprising the aortic root as  
266 determined by the location of the aortic valve leaflets were cut at a thickness of 4  $\mu\text{m}$  or 6  $\mu\text{m}$ .  
267 An operator who was blinded to genotype quantified plaque size in aortic root sections by  
268 computer-assisted morphometric analysis of microscopy images. For each mouse, atherosclerotic  
269 plaque size in aortic root cross-sections was calculated as the average of 5 independent sections  
270 separated by  $\sim 16\mu\text{m}$ . Atherosclerotic plaque composition was examined by  
271 immunohistochemical techniques. Vascular smooth muscle cells were identified with an alkaline  
272 phosphatase-conjugated mouse anti-smooth muscle  $\alpha$ -actin (SMA) monoclonal antibody (clone  
273 1A4, SIGMA) and Vector Red Alkaline Phosphatase Substrate (Vector Laboratories).  
274 Macrophages were detected with a rabbit anti-Mac2 monoclonal antibody (Santa Cruz  
275 Biotechnologies), a biotin-conjugated goat anti-rat secondary antibody and streptavidin-HRP,  
276 DAB substrate (all from Vector Laboratories), with hematoxylin counterstaining. Collagen

277 content was determined by a modified Masson's trichrome staining. Microscopy images were  
278 analyzed using ImageJ software using the Color Deconvolution plugin. Plasma was collected in  
279 EDTA-coated tubes and cholesterol levels were determined using an enzymatic assay  
280 (Cholesterol E, WAKO Diagnostics).

281

282 *Flow cytometry analyses of blood and tissue samples.*

283 Peripheral blood was obtained from the facial vein and collected into EDTA-coated tubes. Bone  
284 marrow cells were flushed out of two femurs and two tibias per mouse. Aortic arches were  
285 digested for 45 minutes at 37°C in RPMI containing 10% FBS and 0.25 mg/ml Liberase TM  
286 (Roche Life Science). Red blood cells were lysed in all samples by treatment with 1X Red Blood  
287 Cell Lysis Buffer (eBioscience ThermoFisher) for 5 minutes on ice. Bone Marrow lineage-  
288 negative cells were defined as negative for CD11b, Gr-1, Ter119, B220, CD3e and CD127. Bone  
289 marrow HSPCs were defined as Lineage-, c-Kit+, Sca1+. Blood classical monocytes were  
290 identified as CD45+, CD115<sup>Hi</sup>, CD43<sup>Lo</sup>, Ly6c<sup>Hi</sup>; patrolling monocytes, as CD45+, CD115<sup>Hi</sup>,  
291 CD43<sup>Hi</sup>, Ly6c<sup>Lo</sup>; neutrophils, as CD45+, CD115<sup>Int</sup>, Ly6g+; T lymphocytes, as CD45+, CD115-,  
292 B220-, CD3+; B lymphocytes, as CD45+, CD115-, CD3-, B220+; and aortic macrophages, as  
293 CD45+, CD3-, Ly6g-, CD11B+, F4/80Hi. Gating strategies can be found in our previous  
294 publications<sup>17, 18</sup>. Samples were stained with combinations of biotinylated and/or fluorescently  
295 labeled antibodies in PBS with 1% FBS for 30 min on ice. The following fluorescent antibodies  
296 were used for staining and flow cytometry analysis: eFluor450-conjugated anti-CD45.2, FITC-  
297 conjugated anti-CD45.2, Pe-Cy7-conjugated anti-CD45.1, FITC-conjugated anti-CD11b,  
298 eFluor450-conjugated anti-CD11B, PE-conjugated anti-CD115, PE-eFluor610-conjugated anti-  
299 CD3, FITC-conjugated anti-CD4 (from eBioscience); APC-Cy7-conjugated anti- B220, PerCP-

300 Cy5.5-conjugated anti-Ly6G, BV510-conjugated anti-Ly6G, BV711-conjugated anti-CD43, PE-  
301 Cy7-conjugated anti-c-Kit, AlexaFluor647-conjugated anti-Sca-1 (from BD Biosciences); PE-  
302 conjugated anti-F4/80 (from R&D Systems); PerCP-Cy5.5-conjugated anti-CD45.1, BV510-  
303 conjugated anti-CD8a, PerCP-Cy5.5-conjugated anti-mouse Ki-67 (from BioLegend).  
304 Fixation/permeabilization for Ki-67 intracellular staining was achieved using commercially  
305 available kits following manufacturer's instructions (Foxp3 Transcription Factor Staining Buffer  
306 Set, eBioscience ThermoFisher). Dead cells were excluded from analysis by DAPI staining in  
307 unfixed samples and by LIVE/DEAD Fixable Near-IR staining (ThermoFisher Scientific) in  
308 fixed samples. BD LSRFortessa and BD FACSymphony Cytometers (BD Bioscience) were used  
309 for data acquisition. Data were analyzed with FlowJo Software.

310

### 311 *Murine macrophage culture and cell cycle analysis*

312 Bone marrow-derived macrophages (BMDM) were obtained from suspensions of femoral BM  
313 and differentiated for 7 days in the presence of RPMI Medium supplemented with antibiotics,  
314 10% fetal bovine serum and 100 ng/ml MCSF. For cell-cycle analysis, MCSF concentration in  
315 cell culture medium was decreased to 5 ng/ml for 48h to induce progressive synchronization of  
316 macrophages in G0 phase (i.e. quiescence) and cell cycle re-entry was induced by treatment with  
317 100 ng/ml MCSF. Macrophages were trypsinized and collected by centrifugation for 5 minutes at  
318 300g. After fixation in 80% ethanol for 1 h at -20°C, cells were incubated for at least 30 minutes  
319 with 50 µg/mL propidium iodide containing 0.25 mg/mL RNase A (both from SIGMA).  
320 Labelled cells were analyzed in a BD LSRFortessa flow cytometer BD Bioscience and DNA  
321 histograms were fitted into cell cycle distributions using ModFit 3.0 software (Verity Software  
322 House).

323  
324 *Gene expression analysis by quantitative real-time PCR (qPCR) and Western Blot.*  
325  
326 Total RNA from aortic arch tissue was isolated using Trizol reagent and RNeasy kits (QIAGEN).  
327 RNA (1 µg) was reverse transcribed with High-Capacity cDNA Reverse Transcription Kit  
328 (Applied Biosystems) and qPCR was performed with SYBR® Green PCR Master Mix (Applied  
329 Biosystems) in a AB7900 Real time PCR system. Results were analyzed with the  $\Delta\Delta C_t$  method.  
330 The average of 36B4 and  $\beta$ -actin was used as reference for normalization. Primer sequences can  
331 be found in our previous publication<sup>17</sup>. For Western Blot analysis of protein levels, protein  
332 extracts from cultured macrophages were obtained using ice-cold lysis buffer (20mM Tris-HCl  
333 pH 7.5, 150 mM NaCl, 1 mM Na<sub>2</sub>EDTA, 1 mM EGTA, 1% Triton) supplemented with protease  
334 and phosphatase inhibitors (Roche Applied Science). Equal amounts of protein lysates were  
335 resolved by SDS-PAGE and the following antibodies were used for immunoblotting: anti-p53  
336 (Cell Signaling, #32532S, dil 1/1000) and HRP anti-alpha tubulin (AbCam, #ab40742, dil  
337 1/2000). An ImageQuant LAS 4000 biomolecular imaging system (GE Healthcare) was used for  
338 image acquisition and the ImageJ software was used for band densitometric analysis.

339  
340 *Statistical analysis of data in experimental studies*  
341 Data are shown as mean  $\pm$  SEM unless otherwise stated. Statistical significance of differences in  
342 experiments with two groups and only one variable was assessed by unpaired Student's t tests  
343 (with Welch correction for unequal variance when appropriate) or Mann-Whitney U Tests.  
344 Differences in experiments with more than one independent variable were evaluated by two-way  
345 analysis of variance (ANOVA) with post-hoc Sidak's multiple comparison tests. All statistical  
346 tests were performed using GraphPad Prism software (GraphPad Software Inc.).

347

## 348 **Results**

### 349 *Study Cohorts and Risk Of Hematologic Malignancy*

350 After excluding individuals with a known history of hematologic malignancy at enrollment, we  
351 identified 37,657 unrelated individuals from the UKB and 12,465 individuals from MGBB with  
352 whole exome sequencing data available for downstream analysis. Using a previously validated  
353 somatic variant detection algorithm<sup>10</sup>, we identified 2,194 (5.8%) and 657 (5.4%) CHIP carriers  
354 in the UKB and MGBB, respectively (**Table III in the supplement**). Demographic and clinical  
355 characteristics of these individuals, stratified by CHIP status, are depicted in **Table IV in the**  
356 **supplement**. CHIP carriers tended to be older, male, previous smokers, and have a history of  
357 coronary artery disease, hypertension, and hyperlipidemia (two-tailed chi-squared and Wilcoxon-  
358 rank sum  $P < 0.05$ ).

359 We first replicated known CHIP associations<sup>10</sup> with white blood cell (Beta 0.09 SD; 95%  
360 CI 0.05-0.13;  $P=1.6 \times 10^{-5}$ ), monocyte (Beta 0.05 SD; 95% CI 0.01-0.09;  $P=0.009$ ), neutrophil  
361 (Beta 0.10 SD; 95% CI 0.06-0.14;  $P=2.1 \times 10^{-6}$ ), and platelet counts (Beta 0.07 SD; 95% CI 0.03-  
362 0.11;  $P=0.0005$ ) in UKB, with larger CHIP clone size as measured by variant allele fraction  
363 (VAF) having stronger effects on blood counts (**Figure III in the supplement**). Consistent with  
364 the existing literature<sup>5, 10</sup>, CHIP also associated with incident hematologic malignancy (HR 2.20;  
365 95% CI 1.70-2.85;  $P=1.8 \times 10^{-9}$ ) - specifically for acute myeloid leukemia (HR 8.08; 95% CI  
366 4.36-14.97;  $P=3.2 \times 10^{-11}$ ), myeloproliferative neoplasms (HR 5.89; 95% CI 3.69-9.89;  $P=9.7 \times 10^{-14}$ ), and polycythemia vera (HR 12.37; 95% CI 4.85-31.54;  $P=1.4 \times 10^{-7}$ ). This risk increased with  
367 larger VAF (**Figure IV in the Supplement**).

369

### 370 *CHIP and Incident PAD Risk*

371 We next tested the association of CHIP status with incident PAD. Using available electronic  
372 health record (EHR) data and a previously validated PAD definition<sup>13</sup>, we identified 338 and 419  
373 incident PAD cases in UKB and MGBB, respectively. CHIP associated with a 58% increased  
374 risk of incident PAD in the UKB (HR<sub>UKB</sub> = 1.58, 95% CI: 1.11-2.25; P=0.01, **Figure 1**), results  
375 that were replicated in MGBB (Overall HR = 1.66, 95% CI: 1.31-2.11; P=2.4x10<sup>-5</sup>). We then  
376 sought to evaluate whether those with larger CHIP clone sizes (i.e., higher VAF) had greater risk  
377 for PAD, as larger CHIP clones associate more strongly with adverse clinical outcomes<sup>6</sup>. We  
378 observed a graded relationship between CHIP VAF and PAD, as those with a VAF > 10% had  
379 even greater risk for an incident PAD event (Overall HR = 1.97, 95% CI: 1.44-2.71; P=2.3x10<sup>-5</sup>,  
380 **Figure 1**). Additional sensitivity analyses, including propensity score adjustment and a marginal  
381 structural Cox proportional hazards model estimated through stabilized inverse-probability-  
382 treatment-weight revealed similar results in the UKB (**Figure V in the supplement**). Subsequent  
383 analyses showed no significant interaction between CHIP status and either age, sex, or smoking  
384 status on incident PAD risk.

385

### 386 *CHIP and Incident Atherosclerosis Across Multiple Vascular Beds*

387 We next assessed whether CHIP was associated with 9 other incident atherosclerotic  
388 diseases across multiple vascular beds. Using EHR-based disease definitions<sup>19</sup>, we tested the  
389 association of CHIP with atherosclerotic disease across the mesenteric (acute and chronic),  
390 coronary, and cerebral vascular beds, as well as with aneurysmal disease (aortic and any other  
391 aneurysm). We observed significant associations for coronary artery disease (HR 1.40, 95% CI:  
392 1.20 to 1.63; P=1.9x10<sup>-5</sup>), any aortic aneurysm (HR 1.74; 95% CI: 1.21 to 2.51; P=0.0028), other  
393 aneurysms (HR 1.70; 95% CI: 1.23 to 2.34; P=0.0013), and chronic mesenteric ischemia (HR

394 9.12; 95% CI: 2.34 to 35.63; P=0.0015) across both cohorts, with directionally consistent effect  
395 estimates observed for all the tested phenotypes (**Figure 2a**). These associations were  
396 consistently stronger for large CHIP clones (**Figure VI in the supplement**). We then created a  
397 composite, incident atherosclerosis outcome combining all nine atherosclerotic phenotypes  
398 (“pan-arterial atherosclerosis”, **Table V in the Supplement**). CHIP associated with this  
399 combined incident pan-arterial atherosclerosis endpoint (HR 1.31, 95% CI: 1.14 to 1.49,  
400  $P=9.7 \times 10^{-5}$ ), again with stronger effects conferred by large CHIP clones (HR 1.45; 95% CI: 1.20  
401 to 1.75;  $P=0.00013$ ) (**Figure 2b,c**).

402

#### 403 *Gene-specific analyses of CHIP with incident atherosclerotic diseases*

404 Next, we sought to understand whether the clonal hematopoiesis putative driver gene  
405 differentially affected the risk of acquiring atherosclerosis. Previous work has focused primarily  
406 on the epigenetic regulators *DNMT3A* and *TET2*<sup>3, 17</sup>, and whether DDR CHIP confers an  
407 increased risk of atherosclerosis is unknown. We stratified the CHIP-PAD and CHIP pan-arterial  
408 atherosclerosis analyses by putative driver genes and specific mutations - focusing on *DNMT3A*,  
409 *TET2*, *ASXL1*, *JAK2*, the DDR genes *PPM1D* and *TP53*, and mutations that specifically disrupt  
410 splicing factor genes (*LUC7L2*, *PRPF8*, *SF3B1*, *SRSF2*, *U2AF1*, and *ZRSR2*)<sup>20</sup>. We observed an  
411 association of CHIP with PAD across the four common CHIP genes (*DNMT3A*, *TET2*, *ASXL1*,  
412 and *JAK2*), with significant heterogeneity of incident PAD effect sizes across the CHIP genes  
413 ( $P_{\text{heterogeneity}} = 0.03$ ) (**Figure 3a**). This heterogeneity persisted in sensitivity analysis after  
414 excluding *JAK2* carriers ( $P_{\text{heterogeneity}} = 0.046$ ). These data also revealed the novel finding that  
415 DDR *TP53* and *PPM1D* CHIP associates with incident PAD (HR 2.72; 95% CI: 1.20 to 1.75;  
416  $P=0.00013$ ) and incident CAD (HR 2.51; 95% CI: 1.52-4.14;  $P=0.00032$ ), with a stronger effect



417 on PAD conferred by *TP53* (HR 4.98; 95% CI: 1.23-20.09; P=0.024, **Figure 3a-c**). Similar  
418 findings were observed for the incident pan-arterial atherosclerosis outcome when stratifying by  
419 putative driver gene (**Figure VII in the supplement**). Further sensitivity analysis for DDR-  
420 CHIP and incident PAD when excluding solid organ malignancy did not significantly change the  
421 associations ( $P_{\text{heterogeneity}} > 0.05$ ).

422

#### 423 *Atherosclerosis development in p53-/- CHIP mice*

424 Based on our gene specific findings, we next further characterized the effects of reduced function  
425 of hematopoietic p53 in atherosclerotic mice. To mimic CHIP and test whether the expansion of  
426 p53-deficient hematopoietic cells contributes to atherosclerosis, a competitive bone marrow  
427 transplantation (BMT) strategy was used to generate atherosclerosis-prone *Ldlr*<sup>-/-</sup> chimeric mice  
428 carrying 20% *Trp53*<sup>-/-</sup> hematopoietic cells (20% KO-BMT mice). These mice then consumed a  
429 high fat/high cholesterol diet for 9 weeks to induce atherosclerosis development. To distinguish  
430 donor *Trp53*<sup>-/-</sup> and *Trp53*<sup>+/+</sup> cells in this experimental setting, *Trp53*<sup>+/+</sup> cells were obtained  
431 from mice carrying the CD45.1 variant of the CD45 hematopoietic antigen, whereas *Trp53*<sup>-/-</sup>  
432 cells were obtained from mice carrying the CD45.2 variant of this protein. Control mice (20%  
433 WT-BMT) were transplanted with 20% CD45.2+ *Trp53*<sup>+/+</sup> cells and 80% CD45.1+ *Trp53*<sup>+/+</sup>  
434 cells (**Figure 4a and Figure II in the supplement**). Flow cytometry analysis of CD45.2+ blood  
435 cells established that this BMT strategy led to a modest, but significant expansion of donor  
436 *Trp53*<sup>-/-</sup> BM-derived cells compared to *Trp53*<sup>+/+</sup> cells in both BM hematopoietic  
437 stem/progenitor cells (HSPCs) and circulating white blood cells (**Figure 4B,C**), consistent with  
438 previous studies<sup>21-23</sup>. Transplanted *Trp53*<sup>-/-</sup> BM cells expanded into all blood cell lineages to a  
439 similar extent, but this relative expansion did not affect absolute blood cell counts (**Figure VIII**

440 **in the supplement**). Having validated this mouse model of p53 CHIP based on a competitive  
441 BMT strategy, we next assessed whether this phenomenon affects the development of  
442 atherosclerosis or related metabolic abnormalities. The presence and expansion of *Trp53*<sup>-/-</sup> cells  
443 led to a significant ~40% increase in plaque size in the aortic root of male *Ldlr*<sup>-/-</sup> mice (**Figure**  
444 **4D**), without affecting body weight, spleen weight or serum cholesterol levels (**Figure VIII in**  
445 **the supplement, C-E**). Similar results were obtained in female *Ldlr*<sup>-/-</sup> mice (**Figure IX in the**  
446 **supplement**). In contrast to previous work on *DNMT3A/TET2* CHIP, the expansion of p53-  
447 deficient cells<sup>12, 17, 18, 24, 25</sup> did not affect the expression of the pro-inflammatory cytokines IL-6  
448 and IL-1 $\beta$  in the atherosclerotic aortic wall (**Figure X in the supplement**).

449  
450 *Proliferation and expansion of p53-deficient macrophages in the murine atherosclerotic aorta*  
451 Increased atherogenesis in mice carrying *Trp53*<sup>-/-</sup> cells was paralleled by a substantial increase  
452 in plaque macrophage content, as assessed by immunohistological staining of Mac2, with no  
453 significant changes in other cell components (**Figure 5A**), suggesting a contribution of increased  
454 arterial macrophage burden to accelerated atherosclerosis in conditions of p53 CHIP. Flow  
455 cytometry analysis of matched samples from blood and digested atherosclerotic aortae from  
456 20% KO-BMT mice revealed substantially higher chimerism in aortic macrophages (~76%  
457 *Trp53*<sup>-/-</sup>) than in blood classical monocytes (~48%), the major source of plaque macrophages  
458 (**Figure 5B**). This expansion of p53-deficient macrophages within the vascular wall was  
459 paralleled by a 2-fold increase in the frequency of proliferating cells within the CD45.2<sup>+</sup> *Trp53*<sup>-/-</sup>  
460 *-* aortic macrophage population compared to CD45.2<sup>+</sup> *Trp53*<sup>+/+</sup> macrophages, as assessed by  
461 flow cytometry analysis of the proliferation-related antigen Ki-67 (**Figure 5C**). Consistent with  
462 our observations *in vivo*, cultured *Trp53*<sup>-/-</sup> macrophages exhibit accelerated mitotic cell cycle

463 progression, with a >2-fold increase in the percentage of S-phase cells upon stimulation with  
464 macrophage colony stimulating factor (MCSF), a major determinant of plaque macrophage  
465 proliferation<sup>26</sup> (**Figure 5D**). *Trp53* expression analysis suggests a central role of p53 in the  
466 normal regulation of macrophage cell cycle progression, as p53 was expressed in quiescent  
467 macrophages at the transcript and protein level and further induced after MCSF stimulation  
468 (**Figure 5E,F**). Furthermore, p53-deficient macrophages exhibited major changes in the  
469 expression of pivotal regulators of cell cycle entry and progression, such as *Cdkn1a/p21<sup>Cip1</sup>* and  
470 Cyclin B1 (**Figure 5G**).

471

## 472 **Discussion**

473 This study combined exome sequencing data across two biobanks to detect somatic  
474 mutations in over 50,000 individuals and observed that the presence of CHIP was significantly  
475 associated with an increased risk of developing PAD and atherosclerosis across multiple arterial  
476 beds. Increased risk was differentially observed across CHIP driver genes with evidence of a  
477 graded relationship with CHIP VAF, with large CHIP clones conferring greater risk of disease.  
478 Lastly, analysis of p53 CHIP using a BMT murine model showed increased aortic atherosclerotic  
479 plaque among p53 CHIP carriers accompanied by expansion of plaque macrophages, supporting  
480 a direct contribution of p53-mutant hematopoietic cells to accelerated atherogenesis.

481 These findings permit several conclusions. First, in humans, CHIP appears to promote  
482 atherosclerosis across the entire arterial system. Previous work linked CHIP with increased risk  
483 of coronary artery disease and early-onset MI<sup>2,3</sup>. We build on these findings by demonstrating  
484 that CHIP is also associated with PAD, and a composite pan-arterial atherosclerosis outcome  
485 reflective of an increased burden of atherosclerosis throughout the human arterial system. In

486 addition, we observed suggestive CHIP associations with aneurysmal degeneration of the aorta.  
487 The genetic and epidemiologic risk factors underlying atherosclerotic occlusive disease and  
488 AAA overlap considerably<sup>27</sup>, and substantial evidence implicates inflammation and macrophage  
489 infiltration in driving this aortic disease<sup>28</sup>. The observed link between CHIP and aneurysmal  
490 disease warrants further investigation in future studies.

491 Second, DDR gene CHIP appears to confer an increased risk of atherosclerotic  
492 cardiovascular disease. In previous work, Jaiswal et al demonstrated an increased risk of  
493 coronary artery disease among individuals with CHIP through *DNMT3A*, *TET2*, *ASXL1*, and  
494 *JAK2* somatic driver mutations<sup>3</sup>. DDR CHIP is often observed among individuals following  
495 cytotoxic chemotherapy for the treatment of malignancy and has been linked to the development  
496 of therapy-related myeloid neoplasms, but limited evidence is available to inform clinical  
497 decision making regarding whether DDR CHIP carriers have increased risk of cardiovascular  
498 disease. The current study demonstrates that CHIP related to DDR-genes (*TP53*, *PPM1D*)  
499 confers an increased risk of developing atherosclerosis. These findings lend human genetic  
500 support to the concept that post-cytotoxic chemotherapy patients may benefit from surveillance  
501 for atherosclerotic conditions in addition to therapy-related myeloid neoplasms.

502 Third, CHIP related to *TP53* mutations appears to drive atherosclerosis risk via expansion  
503 of p53-deficient macrophages in occlusive plaque lesions. Previous experimental studies  
504 assessed the role of p53 in atherogenesis using mice engineered to exhibit gain or loss of  
505 function of p53 in the whole body or in specific cell types, with a variety of results<sup>29-35</sup>. Here we  
506 demonstrate that carrying a fraction of p53-deficient blood cells is sufficient to accelerate  
507 atherosclerosis development, as these cells have a selective advantage to expand, both in HSPCs  
508 within the BM and in macrophages within the arterial wall, leading to increased macrophage

509 burden in the atherosclerotic plaque. Mechanistically, p53-deficient macrophage expansion  
510 seems related to increased proliferation, a major driver of macrophage burden in atherosclerotic  
511 plaques<sup>36</sup>. Although p53 expression is typically induced by DNA damage or other kinds of  
512 cellular stress, we found that it is expressed in resting conditions in cultured macrophages and  
513 further induced by mitogenic stimulation, suggesting a physiological role in the regulation of  
514 macrophage cell cycle progression. Accordingly, p53-deficient macrophages exhibited  
515 accelerated cell cycle kinetics. Overall, these experimental findings provide support to the notion  
516 that *TP53* CHIP mutations contribute directly to accelerated atherosclerosis and highlight major  
517 differences in the mechanisms underlying accelerated atherosclerosis in CHIP driven by  
518 mutations in *TP53* or epigenetic regulators. Previous murine studies on *Tet2* CHIP showed that  
519 TET2-deficient cells expand in bone marrow and blood, but not in the atherosclerotic plaque. In  
520 contrast, we found that p53 exhibits a double competitive advantage, expanding in both the BM  
521 and arterial wall, which suggests that small *TP53*-mutant blood clones may be sufficient to  
522 accelerate atherosclerosis development. Evaluating this possibility will require additional studies  
523 using high sensitivity sequencing strategies. Furthermore, in contrast to previous reports related  
524 to *DNMT3A/TET2* CHIP<sup>12, 17, 18, 24, 25</sup>, we did not observe a significant effect of p53 deficiency on  
525 the expression of the pro-inflammatory cytokines IL-1 $\beta$  and IL-6. These results are consistent  
526 with previous human data showing that circulating levels of pro-inflammatory cytokines are  
527 significantly increased in carriers of CHIP driven by mutations in these epigenetic regulators, but  
528 not in carriers of mutations in *TP53* or *PPM1D*<sup>10</sup>. These mechanistic differences between *TP53*-  
529 CHIP and *DNMT3A/TET2*-CHIP require consideration when designing preventive care strategies  
530 targeting the effects of CHIP on atherosclerosis. Thus, while the pathogenic effects of TET2-  
531 CHIP may be prevented by targeting IL-1 $\beta$ -driven inflammation<sup>17</sup>, accelerated atherosclerosis

532 associated with *TP53* mutations may be better tackled by other strategies. Additional  
533 experimental and clinical studies should evaluate these opportunities for personalized medicine  
534 in the context of CHIP.

535 Lastly, a recent publication has generated a novel hypothesis regarding the relationship  
536 between CHIP and atherosclerosis<sup>37</sup>. In their analysis, Heyde et al. suggest that CHIP may be a  
537 symptom of the atherosclerosis trait complex (the interplay of chronic inflammation,  
538 hyperlipidemia, and arterial plaque), rather than a causal risk factor, based on murine and human  
539 observations that atherosclerosis may accelerate HSC proliferation and somatic evolution. While  
540 their study engenders an intriguing hypothesis, there are several observations in the literature and  
541 in our current study that we believe do not support this interpretation. Firstly, in the Heyde et al.  
542 study, *Ldlr*-null mice irradiated and transplanted with bone marrow of *Tet2*<sup>-/-</sup> mice that were fed  
543 an atherogenic diet demonstrated greater *Tet2*<sup>-/-</sup> neutrophil and monocyte expansion than  
544 similar mice fed normal chow. However, in marked contrast, we previously showed that *Tet2*<sup>-/-</sup>  
545 cells expand similarly when *Ldlr*-null mice are fed either a high cholesterol diet or normal  
546 chow<sup>17</sup>. Furthermore, in our prior work, the expansion of *Tet2*<sup>-/-</sup> cells was completely unaffected  
547 by treatment with a pharmacological NLRP3 inhibitor, even though this inhibitor led to a 2-fold  
548 decrease in atherosclerotic plaque size<sup>17</sup>. Secondly, in our current analysis of the pan-arterial  
549 atherosclerosis endpoint, CHIP was associated with incident atherosclerotic events among a pool  
550 of individuals without any history of atherosclerosis at baseline - suggesting that CHIP precedes  
551 clinically significant occlusive disease. Thirdly, Heyde et al. state that the uniform hazard ratios  
552 observed for the CHIP-coronary artery disease association provide supportive evidence for the  
553 notion that atherosclerotic disease precedes the development of clonal hematopoiesis. However,  
554 in our study we identify significant heterogeneity of incident PAD effect sizes when stratifying

555 by CHIP genes, as well as a dose-response relationship between CHIP clone size (or VAF) and  
556 incidence of atherosclerosis, suggesting that CHIP genes vary in their effect on incident PAD  
557 risk, and that expanded CHIP variants have a stronger influence on future atherosclerotic risk.  
558 Thus, given the 1) association with incident atherosclerotic disease, 2) dose-response relationship  
559 with CHIP clone size and heterogeneity by CHIP gene, and 3) that *TP53*, *TET2*, and *JAK2*<sup>38</sup>  
560 appear to drive atherosclerosis through disparate mechanisms, clonal hematopoiesis acting as a  
561 causal risk factor appears to be a more parsimonious explanation to unify these findings.

562         Several limitations merit mention. First, our PAD and cardiovascular disease phenotypes  
563 are based on EHR data and may result in misclassification of case status. Such misclassification  
564 would likely reduce statistical power for discovery and on average bias results toward the null.  
565 Second, selection bias from differential loss-of-follow up, volunteer bias, and missingness in  
566 covariates may be present given the nature of the genetic biobanks used in this study. Third,  
567 while we maximized the number of participants in our analysis of CHIP and additional  
568 atherosclerotic diseases, it may still have been underpowered for certain phenotypes. Lastly, the  
569 cohorts in these studies are largely of European ancestry; while prior reports have not observed  
570 significant phenotypic differences in CHIP associations by ancestry<sup>5, 12</sup>, further epidemiological  
571 studies in ethnically diverse individuals are required to ensure that this is the case for PAD as  
572 well.

573         In conclusion, CHIP is associated with incident atherosclerosis in multiple vascular beds,  
574 with murine evidence of increased plaque among *TP53* CHIP carriers through an expansion of  
575 plaque macrophages (**Figure 6**). The observations presented here expand insight into CHIP-  
576 mediated atherosclerosis. The novel finding that DDR gene CHIP plays a particular role in PAD  
577 raises new questions regarding the mechanisms of regional heterogeneity of atherosclerotic

578 involvement in face of systemic exposure to traditional risk factors such as dyslipidemia,  
579 hypertension, and smoking.



580  
581  
582  
583  
584  
585  
586  
587  
588  
589  
590  
591  
592  
593  
594  
595  
596  
597  
598  
599  
600  
601  
602  
603  
604  
605  
606  
607  
608  
609  
610  
611  
612  
613  
614  
615  
616  
617  
618  
619  
620  
621  
622  
623  
624  
625

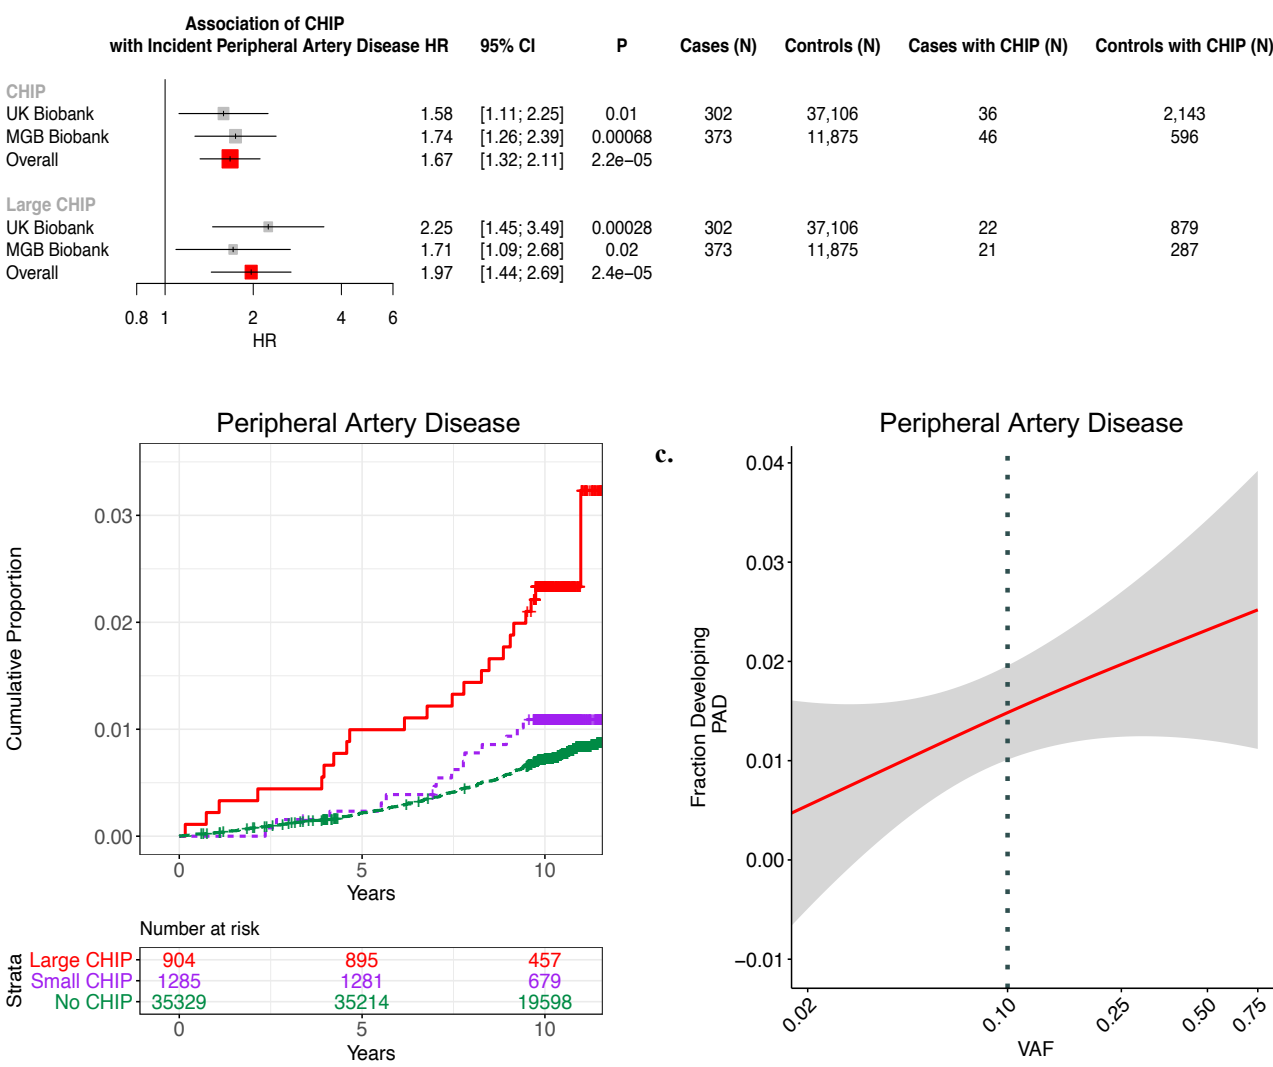

**Figure 1. CHIP and incident PAD risk.** a) Association of CHIP and large CHIP (VAF>10%) carrier state with incident PAD events in the UK Biobank (UKB) and Mass General Brigham Biobank (MGBB). Results were combined using an inverse-variance weighted fixed effects meta-analysis. b) Cumulative proportion of individuals developing PAD stratified by CHIP VAF clone size category in the UK Biobank. c) Fraction of individuals developing incident PAD by CHIP VAF in the UK Biobank. CHIP = clonal hematopoiesis of indeterminate potential; VAF = variant allele fraction; PAD = peripheral artery disease

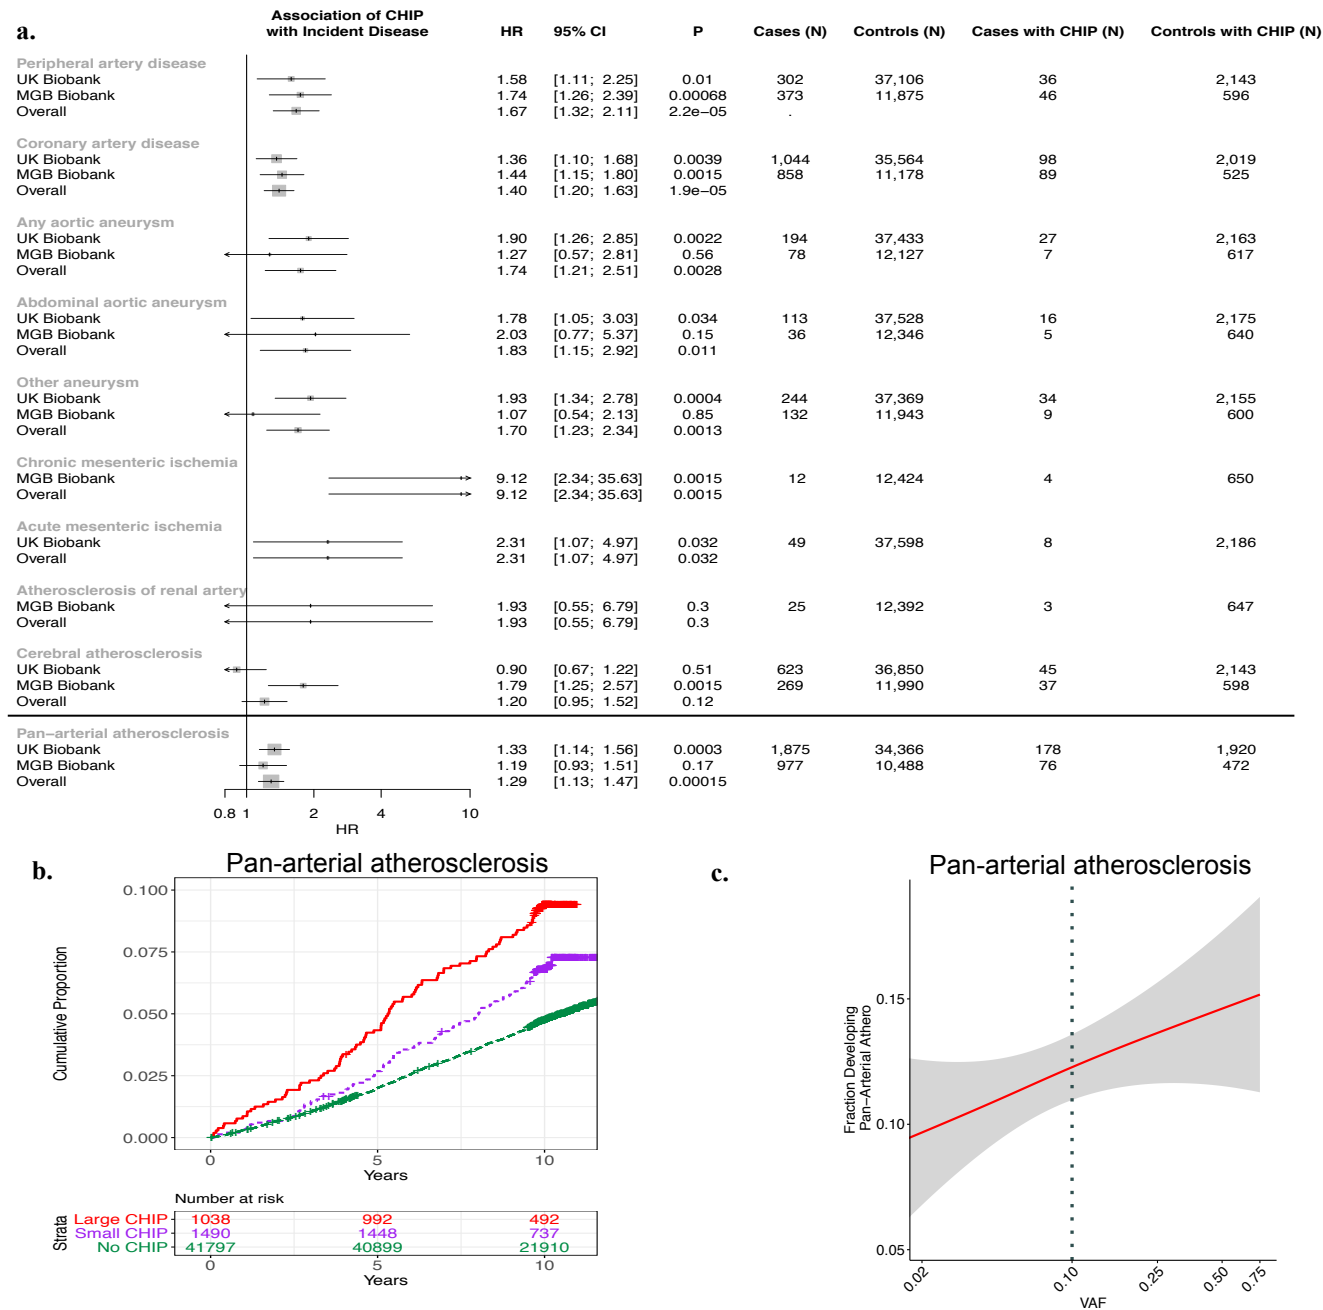

626  
 627 **Figure 2. CHIP and incident pan-arterial atherosclerosis risk.** a) Association of CHIP with 9  
 628 incident atherosclerotic diseases separately and combined in a ‘Pan-arterial atherosclerosis’  
 629 phenotype in the UKB, MGBB, and meta-analyzed across both studies (“Overall”). b)  
 630 Cumulative risk of incident atherosclerosis across the composite ‘pan-arterial atherosclerosis’  
 631 phenotype stratified by no CHIP, small CHIP (VAF<10%), and large CHIP (VAF≥10%) carrier  
 632 state in the UK Biobank. c) Association of CHIP VAF with fraction of individuals developing  
 633 pan-arterial atherosclerosis in the UK Biobank. CHIP = clonal hematopoiesis of indeterminate  
 634 potential; VAF = variant allele fraction; PAD = peripheral artery disease

a.

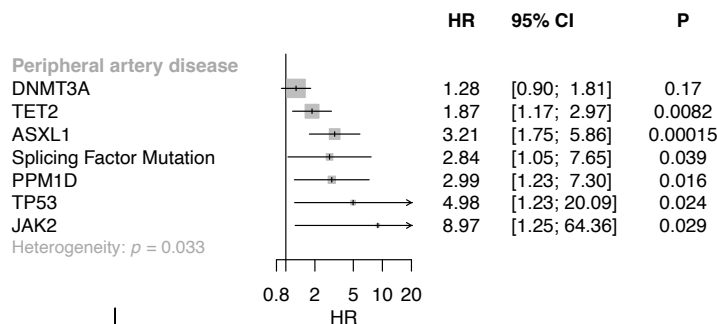

b.

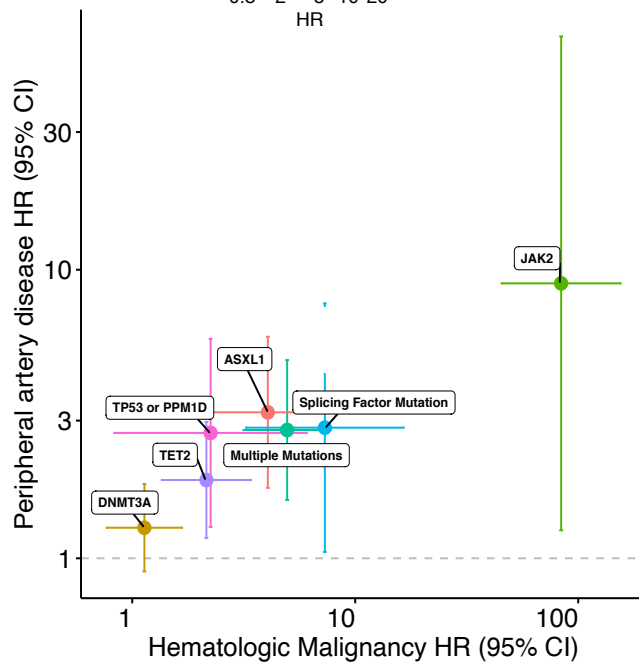

c.

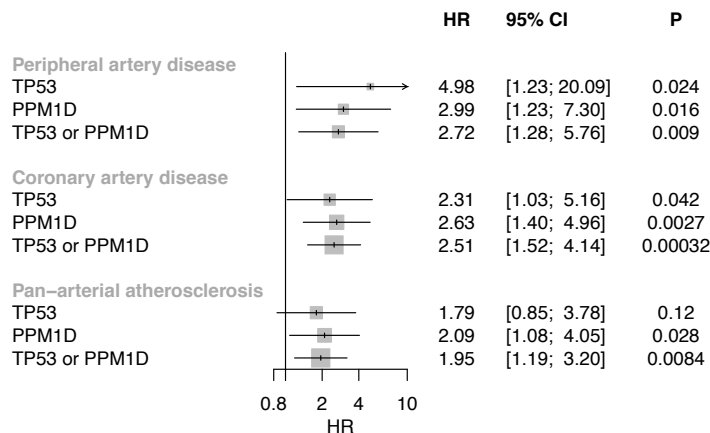

635  
636  
637  
638  
639  
640  
641  
642  
643  
644  
645  
646  
647  
648  
649  
650  
651  
652  
653  
654  
655  
656  
657  
658  
659  
660

661 **Figure 3: Gene-specific association of CHIP with incident peripheral artery disease (PAD).**

662 a) CHIP-PAD association analyses stratified by putative CHIP driver gene. Results following  
663 meta-analysis across the UKB and MGBB are shown. b) Gene-specific comparison of HR and  
664 95% CI for hematologic malignancy (x-axis) and PAD (y-axis) in the UKB. c) Association of  
665 DDR CHIP (*PPM1D* or *TP53*) with incident peripheral artery disease, coronary artery disease,  
666 and pan-vascular atherosclerosis. Results across UK Biobank and MGB Biobank were combined  
667 using an inverse-variance weighted fixed effects meta-analysis. CHIP = clonal hematopoiesis of  
668 indeterminate potential; DDR = DNA-damage repair; VAF = variant allele fraction; PAD =  
669 peripheral artery disease

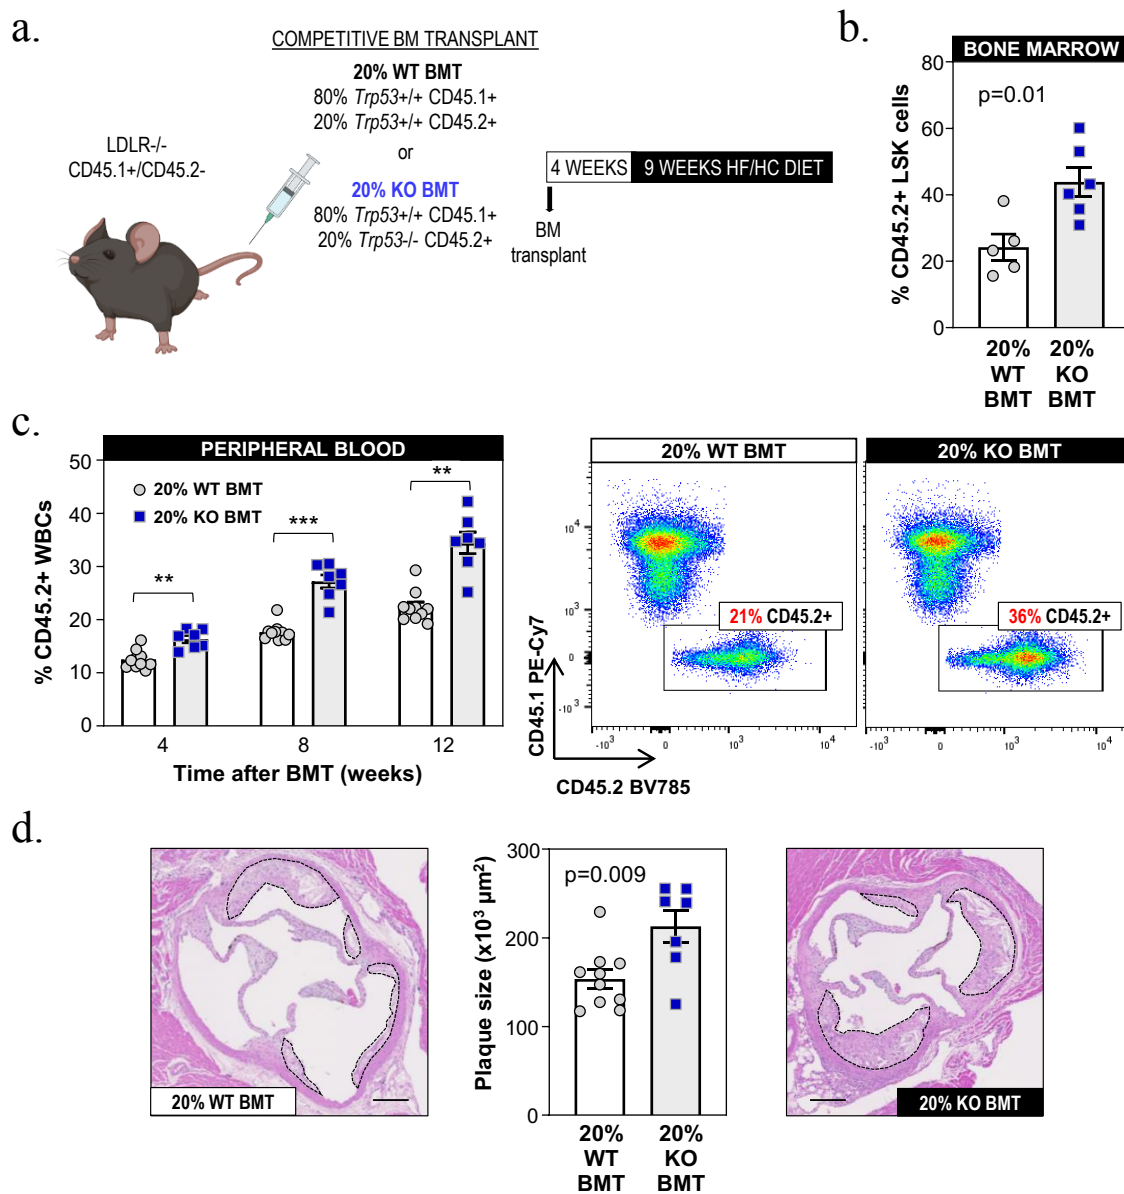

670

671 **Figure 4: Accelerated atherosclerosis in a murine model of *TP53* mutation-driven CHIP.**  
 672 a) Summary of the competitive BMT approach and the timeline of these studies. 20% KO-BMT  
 673 male mice and 20% WT-BMT controls were fed a high-fat/high-cholesterol (HF/HC) diet for 9  
 674 weeks, starting 4 weeks after BMT (n=10 20% WT-BMT, n=7 20% KO-BMT, unless otherwise  
 675 noted). b) Percentage of CD45.2<sup>+</sup> cells in the bone marrow HSPC population (Lin<sup>-</sup> Sca1<sup>+</sup> cKit<sup>+</sup>  
 676 cells) after 9 weeks on HF/HC diet (13 weeks post-BMT), evaluated by flow cytometry (n= 5  
 677 20% WT-BMT, n=6 20% KO-BMT). c) Percentage of CD45.2<sup>+</sup> in white blood cells, evaluated  
 678 by flow cytometry (\*\*p<0.01, \*\*\*p<0.001). Representative CD45.1/CD45.2 dot plots are shown.  
 679 d) Aortic root plaque size. Representative images of hematoxylin and eosin-stained sections are  
 680 shown; atherosclerotic plaques are delineated by dashed lines. Scale bars, 100 μm.

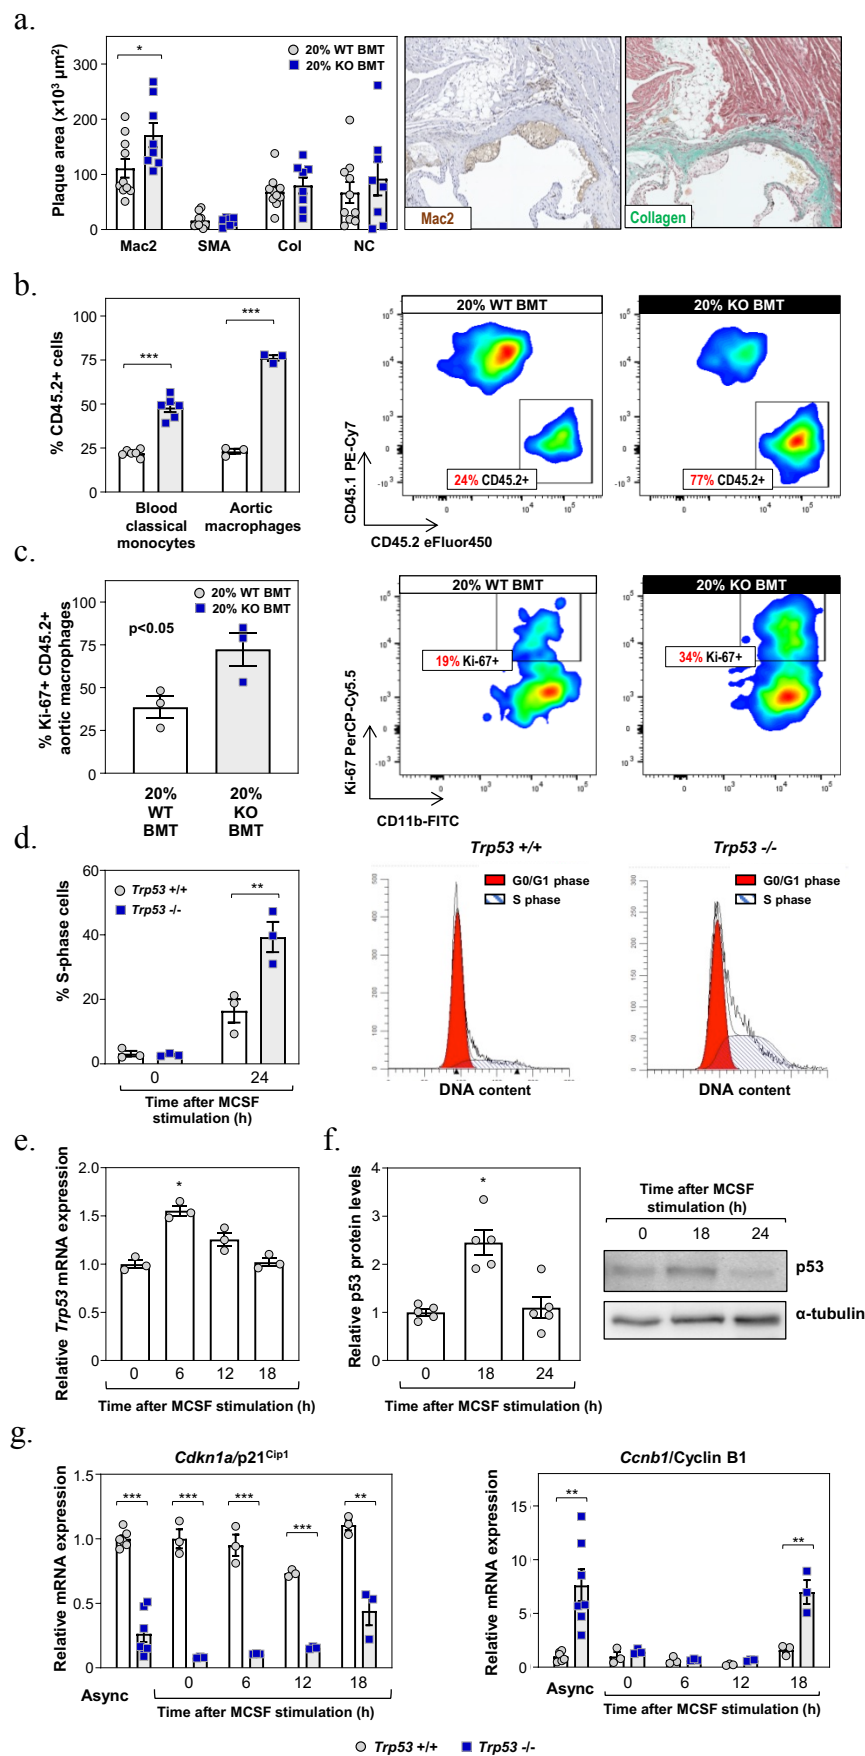

682 **Figure 5: Increased proliferation and expansion of p53-deficient macrophages.** a) Plaque  
683 composition in 20% KO BMT female mice (n=10) and controls (n=8) quantified as absolute  
684 intimal content of macrophages (Mac2 antigen immunostaining), vascular smooth muscle cells  
685 (smooth muscle  $\alpha$ -actin, SMA immunostaining), collagen (Masson's trichrome staining) and  
686 necrotic core (collagen-free acellular regions). Representative images of Mac2- and collagen-  
687 stained histological sections of 20% KO BMT mice are shown. b) Percentage of CD45.2+ cells  
688 within the aortic macrophage population (CD3-, Ly6g-, CD11B+, F4/80<sup>Hi</sup>, n = 3 pools of two  
689 aortic arches per BM genotype) and blood classical monocytes (CD3-, CD115<sup>Hi</sup>, Ly6g-, CD43<sup>Lo</sup>,  
690 Ly6c<sup>Hi</sup>, n=6 per BM genotype) of 20% KO BMT mice and controls, evaluated by flow  
691 cytometry. Representative CD45.1/CD45.2 plots of aortic macrophages are shown. c) Percentage  
692 of Ki-67+ proliferating cells within the aortic CD45.2+ macrophage population of 20% KO  
693 BMT mice and controls (n = 3 pools of two aortic arches per BM genotype), evaluated by flow  
694 cytometry. Representative plots are shown. d) % of S-phase cells in cultures of *Trp53*<sup>-/-</sup> and *+/+*  
695 murine bone marrow-derived macrophages, evaluated by propidium iodide staining of cellular  
696 DNA content and flow cytometry; treatment with MCSF was used to induce cell cycle entry and  
697 progression in quiescent G0-synchronized macrophages (a representative experiment with  
698 macrophages from n=3 mice per genotype is shown). e, f) qPCR (e) and Western Blot (f)  
699 analyses of *Trp53* expression in cultured macrophages after MCSF mitogenic stimulation. p53  
700 protein levels were normalized to  $\alpha$ -tubulin. A representative blot is shown. g) Expression of cell  
701 cycle regulators *Cdkn1a/p21*<sup>Cip1</sup> and *Ccnb1/Cyclin B1* in cultured *Trp53*<sup>-/-</sup> and *+/+* macrophages  
702 proliferating asynchronously (Async) or after MCSF stimulation. \*p<0.05, \*\*p<0.01,  
703 \*\*\*p<0.001.

704

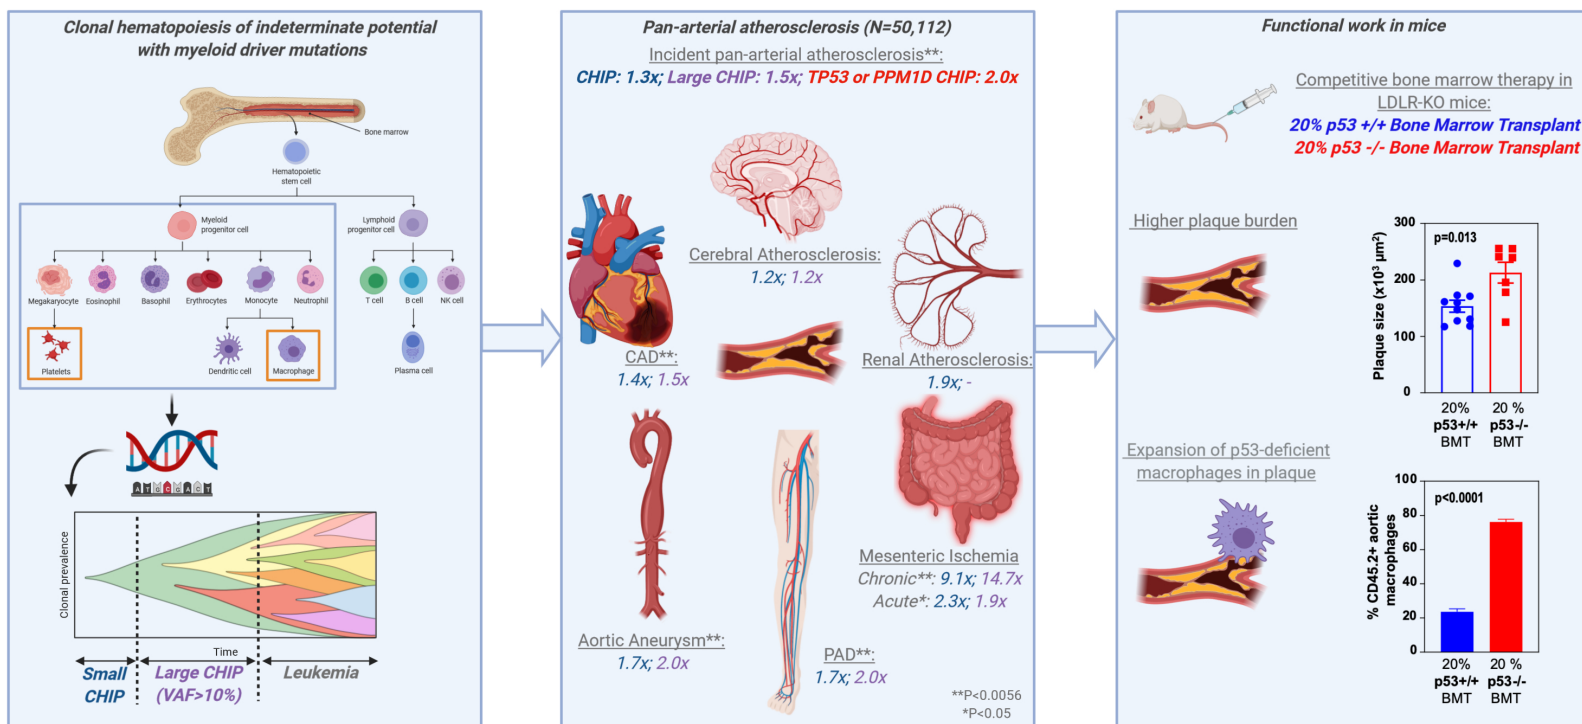

705

706

707 **Figure 6.** In this study, we assessed the association of clonal hematopoiesis of indeterminate  
 708 potential (CHIP) with myeloid driver mutations with pan-arterial atherosclerosis. CHIP is a  
 709 category of age-related somatic variants which are associated with incident leukemia and thought  
 710 to be implicated in atherosclerosis primarily by altering macrophage function and promoting  
 711 thrombosis. CHIP clones can be characterized by the fraction of blood cells carrying the clone,  
 712 referred to as the variant allele fraction (VAF); here we categorized large CHIP clones as  
 713 variants with VAF>10%. Across 50,112 individuals from the UK Biobank and Mass-General  
 714 Brigham Biobank, we observed that CHIP is associated with increased risk of incident peripheral  
 715 and pan-arterial atherosclerosis, with stronger effects conferred by large CHIP clones (HR 1.5x).  
 716 In addition, we observed and a novel associations for TP53 and PPM1D CHIP (HR 2.0x). CHIP  
 717 was found to be individually associated with a variety of atherosclerotic conditions, with  
 718 Bonferroni-significant associations (double-starred, \*\*) identified for peripheral artery disease  
 719 (PAD), coronary artery disease (CAD), aortic aneurysm, and chronic mesenteric ischemia. HR  
 720 for CHIP are displayed in blue and for large CHIP in purple. Functional analysis was performed  
 721 to further investigate the observed TP53-PAD association. *Ldlr*-KO 20% p53 -/- bone-marrow  
 722 transplanted mice had a significant increase in plaque size, with significant expansion of p53-  
 723 deficient macrophages in plaque (P<0.001) at 12 weeks.

724

725

726

727  
728

729

730

731

732

733

734

735

736

737

738

739

740

741

742

743

744

745

746

747

748

749

750

751

752

753

754

755

756

757

758

759

760

761

762

763

764

765

766

767

768

769

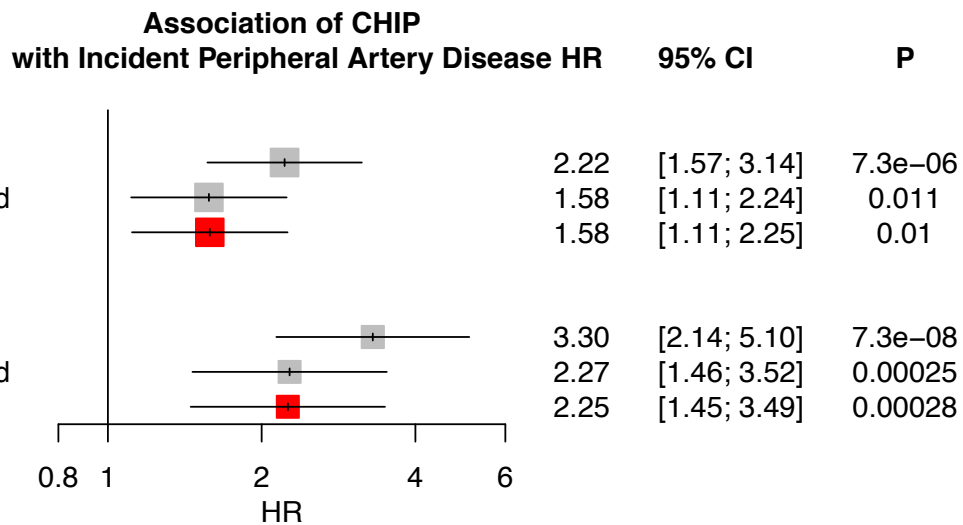

**Supplementary Figure I.** Association of CHIP and Large CHIP (variant allele fraction > 10%) with PAD in the UKB under 1) unadjusted, 2) sparsely adjusted, and 3) fully adjusted models, where sparsely adjusted refers to the following covariates: age, age<sup>2</sup>, sex, smoking status, Townsend deprivation index, and the first ten principal components of genetic ancestry, and the fully adjusted model additionally includes normalized BMI, prevalent hypertension, hyperlipidemia, and type 2 diabetes as covariates. Given the minimal difference between the sparsely adjusted and fully adjusted model, the sparsely adjusted model was moved forward for use in analysis.



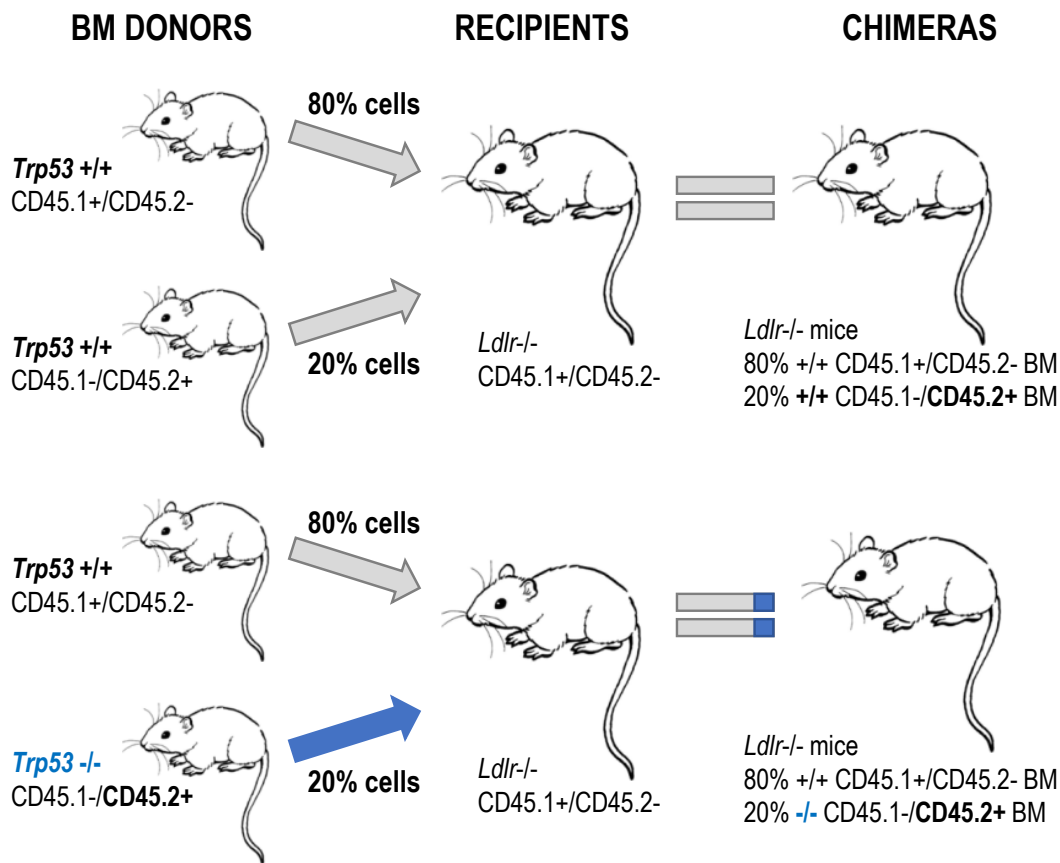

770  
771  
772  
773  
774  
775

**Supplementary Figure II.** Competitive bone marrow transplantation approach to generate a murine model of p53 CHIP

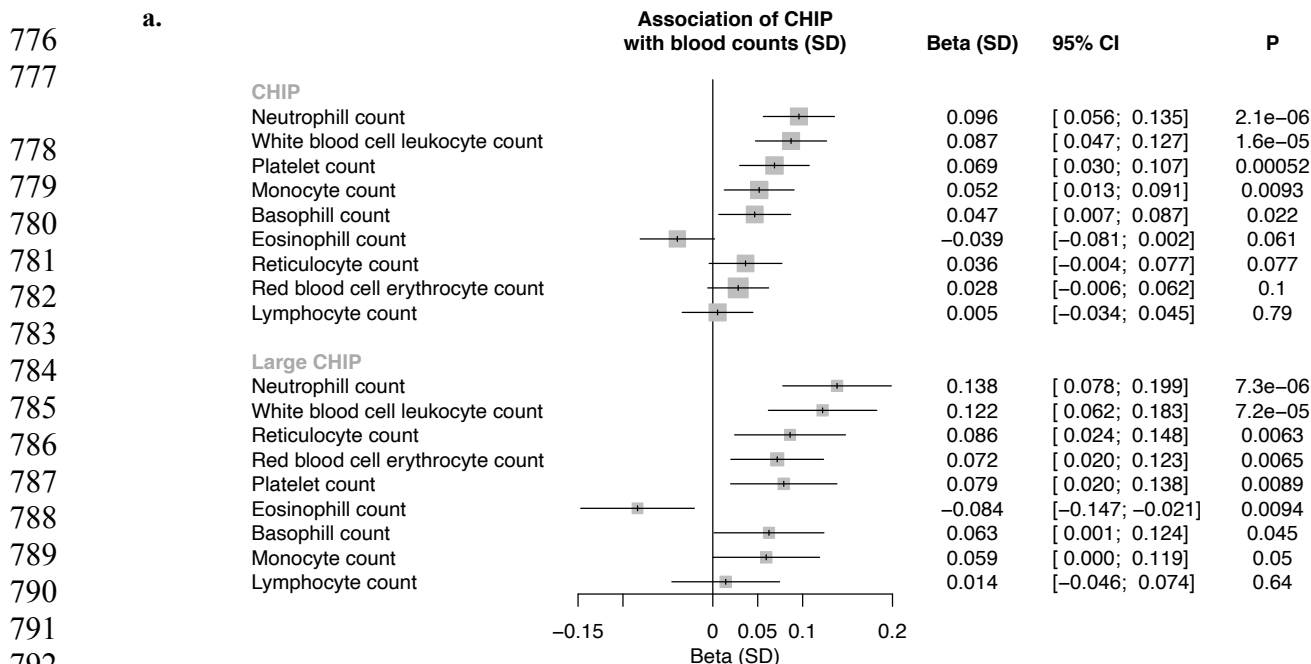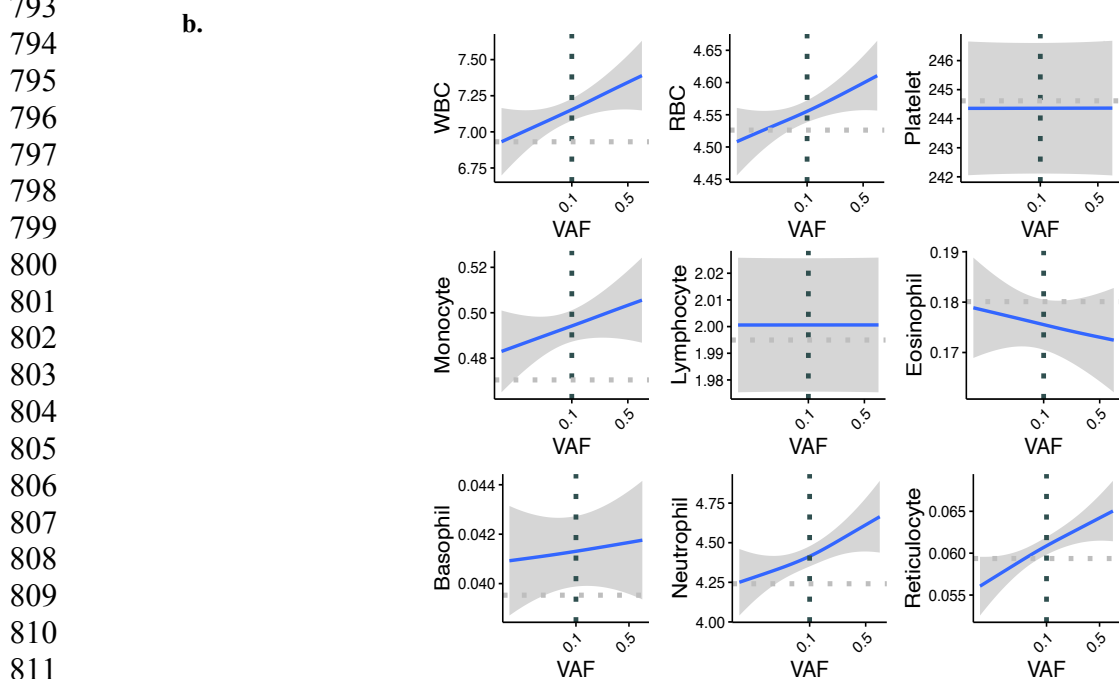

**Supplementary Figure III.** Association of CHIP with blood counts among individuals without prevalent hematologic malignancy in the UK Biobank. Blood counts were acquired at time of blood draw for whole exome sequencing. a) Association of CHIP and Large CHIP with normalized blood counts (SD). Associations are adjusted for age, age<sup>2</sup>, sex, smoking status, and the first ten principal components of genetic ancestry. b) Association of CHIP variant allele frequency (VAF) with blood counts (in units of 10<sup>9</sup> cells/L). The gray horizontal dotted lines reflect average counts across non-CHIP carriers. The vertical black dotted line reflects the cutoff VAF for Large CHIP (VAF>0.1). CHIP = clonal hematopoiesis of indeterminate potential; VAF = variant allele fraction

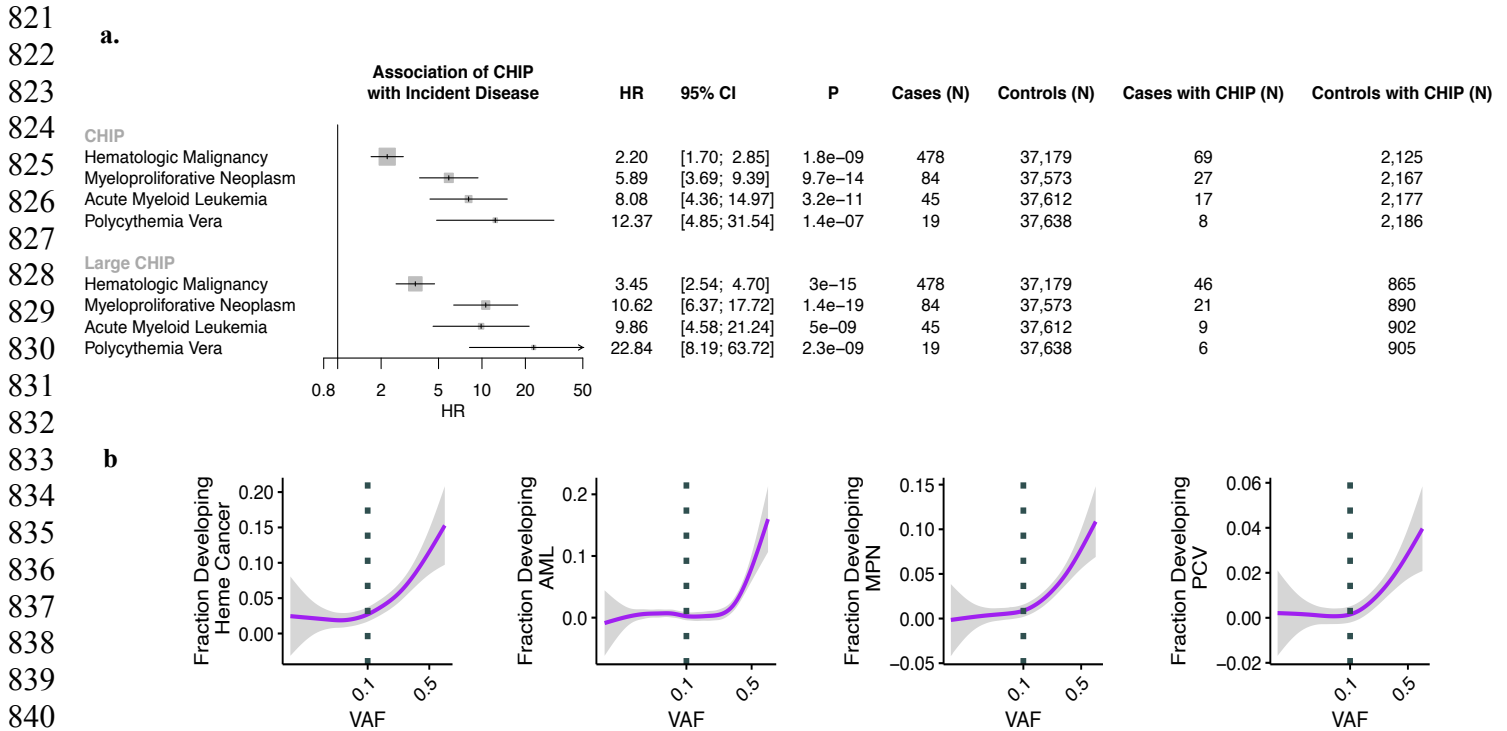

850  
851  
852  
853  
854  
855  
856  
857  
858  
859  
860  
861  
862  
863  
864  
865  
866  
867  
868  
869  
870  
871  
872  
873  
874  
875  
876  
877  
878  
879  
880

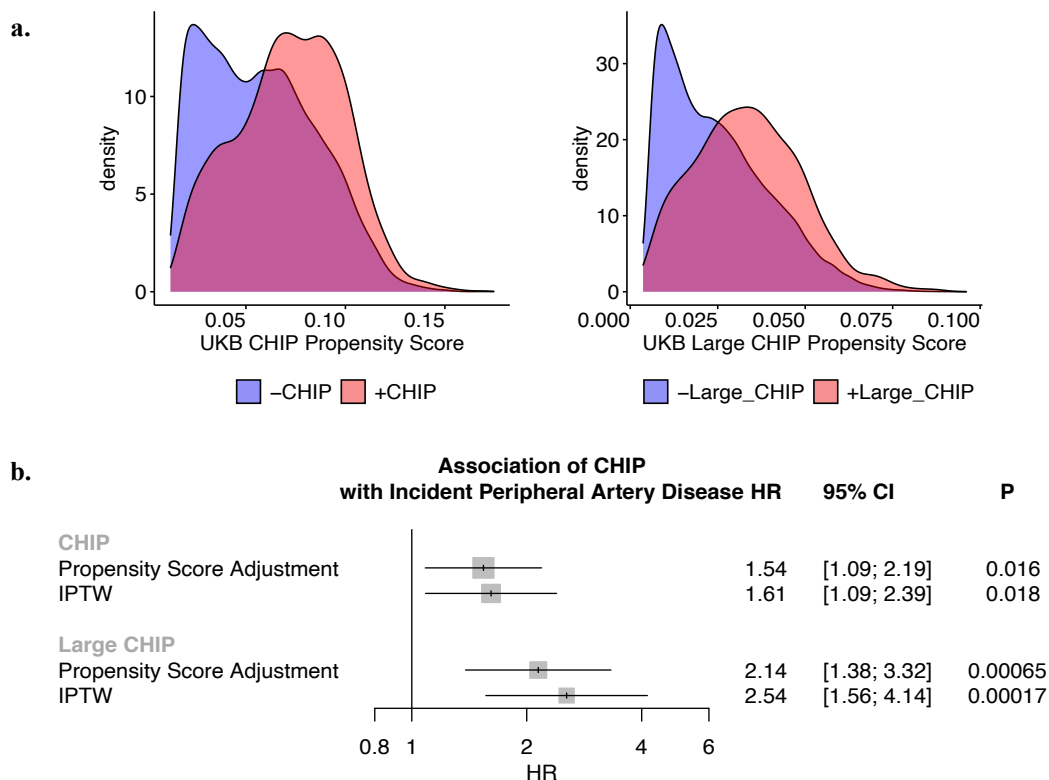

**Supplementary Figure V: Epidemiological causal inference analysis for CHIP on incident peripheral artery disease in the UK Biobank. a)** Propensity scores by CHIP and Large CHIP status in the UKB. **b)** Propensity score adjustment and stabilized inverse probability treatment weighting (IPTW) for the CHIP and Large CHIP association with incident PAD in the UKB. CHIP = clonal hematopoiesis of indeterminate potential; VAF = variant allele fraction; PAD = peripheral artery disease

881  
882  
883  
884

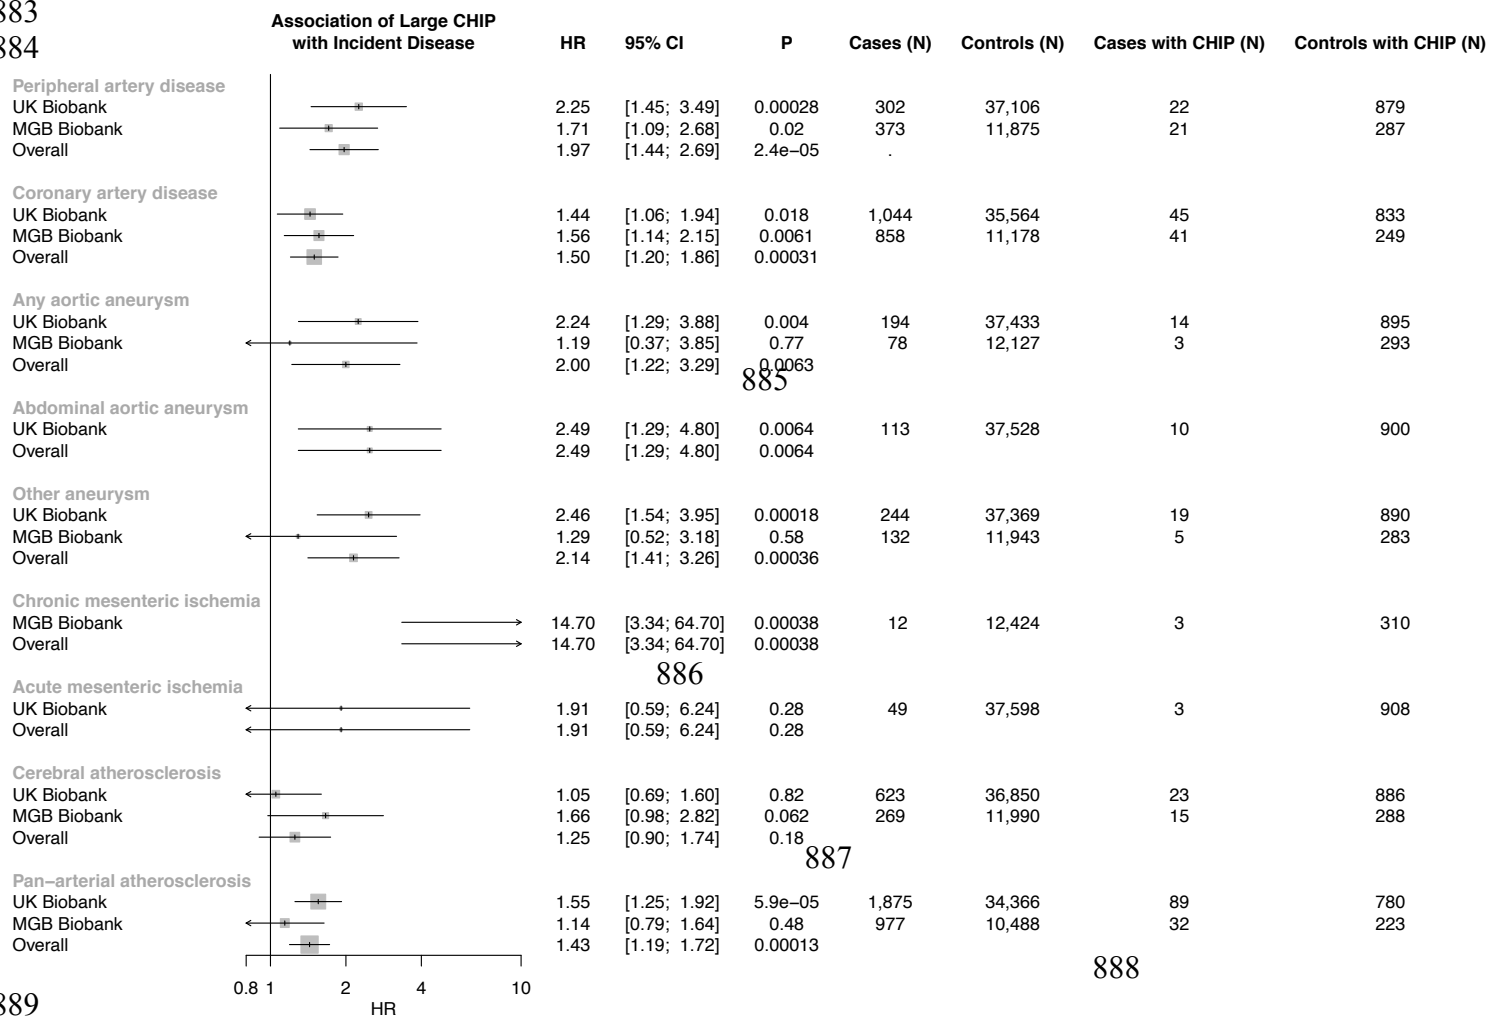

889  
890  
891  
892  
893  
894  
895  
896

**Supplementary Figure VI:** Association of Large CHIP (VAF>10%) with incident pan-arterial atherosclerosis, combined across peripheral artery disease, coronary artery disease, aneurysms, chronic and acute mesenteric ischemia, cerebral atherosclerosis, and renal artery stenosis. CHIP = clonal hematopoiesis of indeterminate potential; VAF = variant allele fraction

897

898 a.

899

900

901

902

903

904

905

906

907

908

909

910

911

912

913

914

915

916

917

918

919

920

921

922

923

924

925

926

927

928

929

930

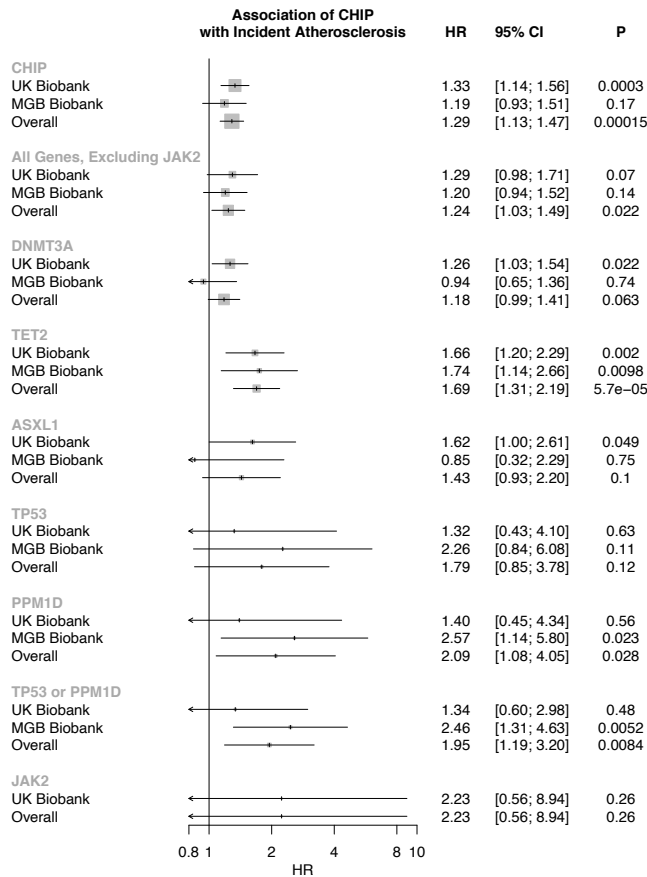

b.

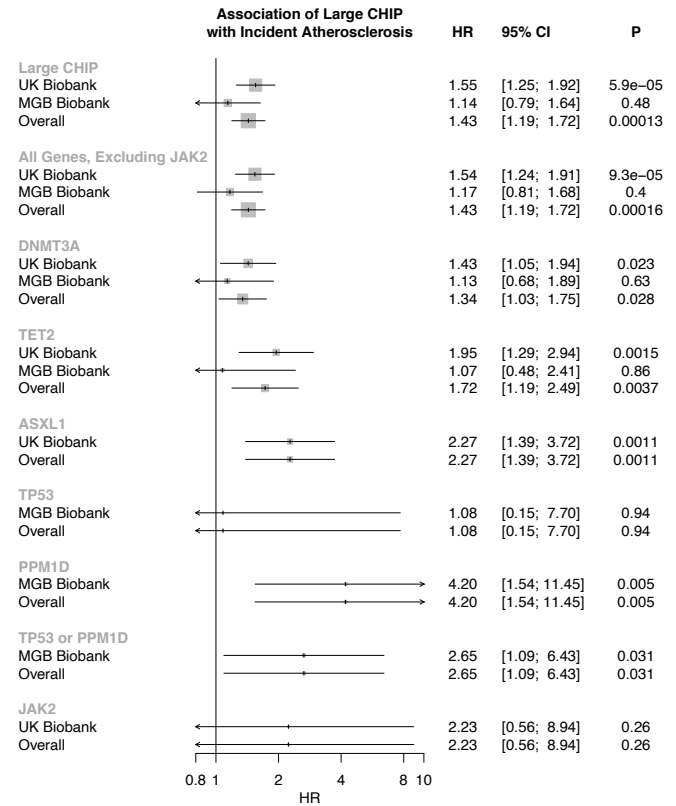

**Supplementary Figure VII: Association of a) CHIP and b) Large CHIP genes with incident pan-arterial atherosclerosis, combined across peripheral artery disease, coronary artery disease, aneurysms, chronic and acute mesenteric ischemia, cerebral atherosclerosis, and renal artery stenosis. CHIP = clonal hematopoiesis of indeterminate potential; VAF = variant allele fraction**

931  
932

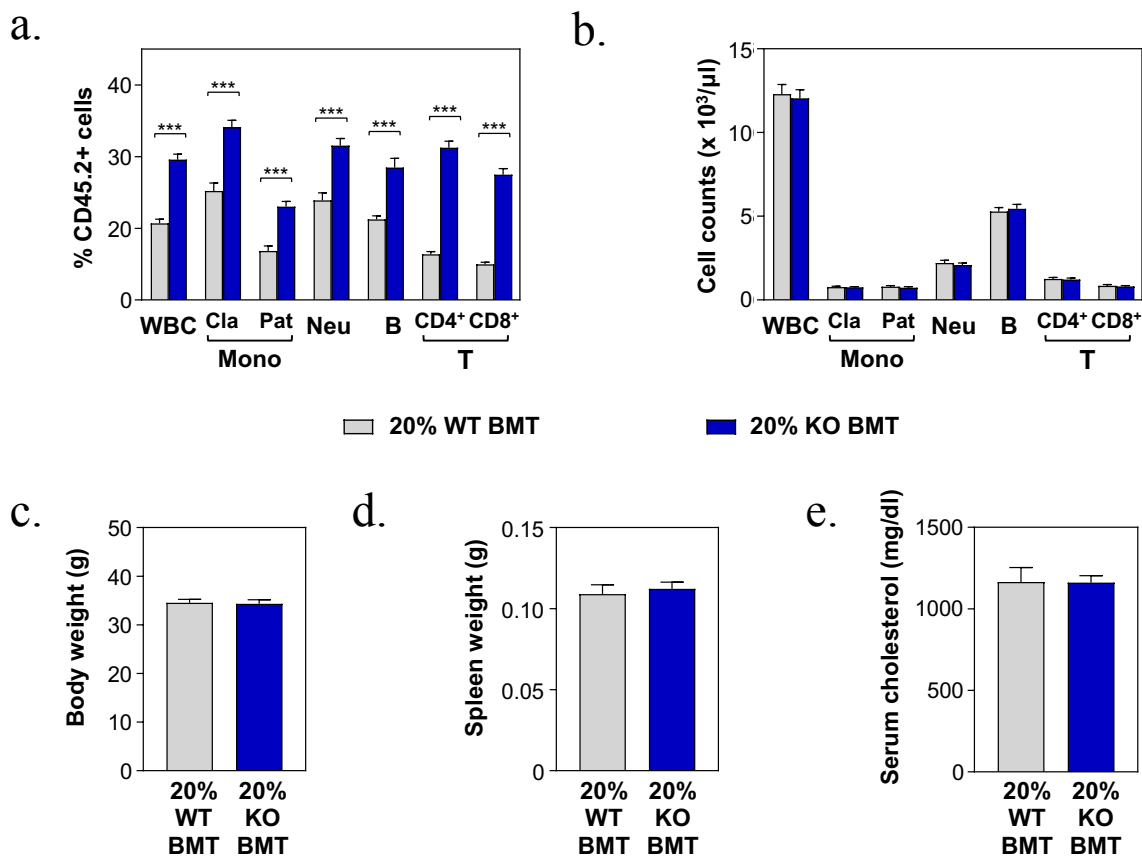

933  
934  
935  
936  
937  
938  
939  
940  
941  
942  
943

**Supplementary Figure VIII:** 20% KO-BMT male mice and 20% WT-BMT controls were fed a high-fat/high-cholesterol (HF/HC) diet for 9 weeks, starting 4 weeks after BMT. a) Percentage of CD45.2+ cells in different white blood cell (WBC) lineages in peripheral blood, evaluated by flow cytometry (\*\*\*)  $p < 0.001$ . b) Absolute counts of main WBC sub-populations in peripheral blood, evaluated by flow cytometry. c) Body weight. d) Spleen weight. e) Total cholesterol level in serum, evaluated by enzymatic methods.

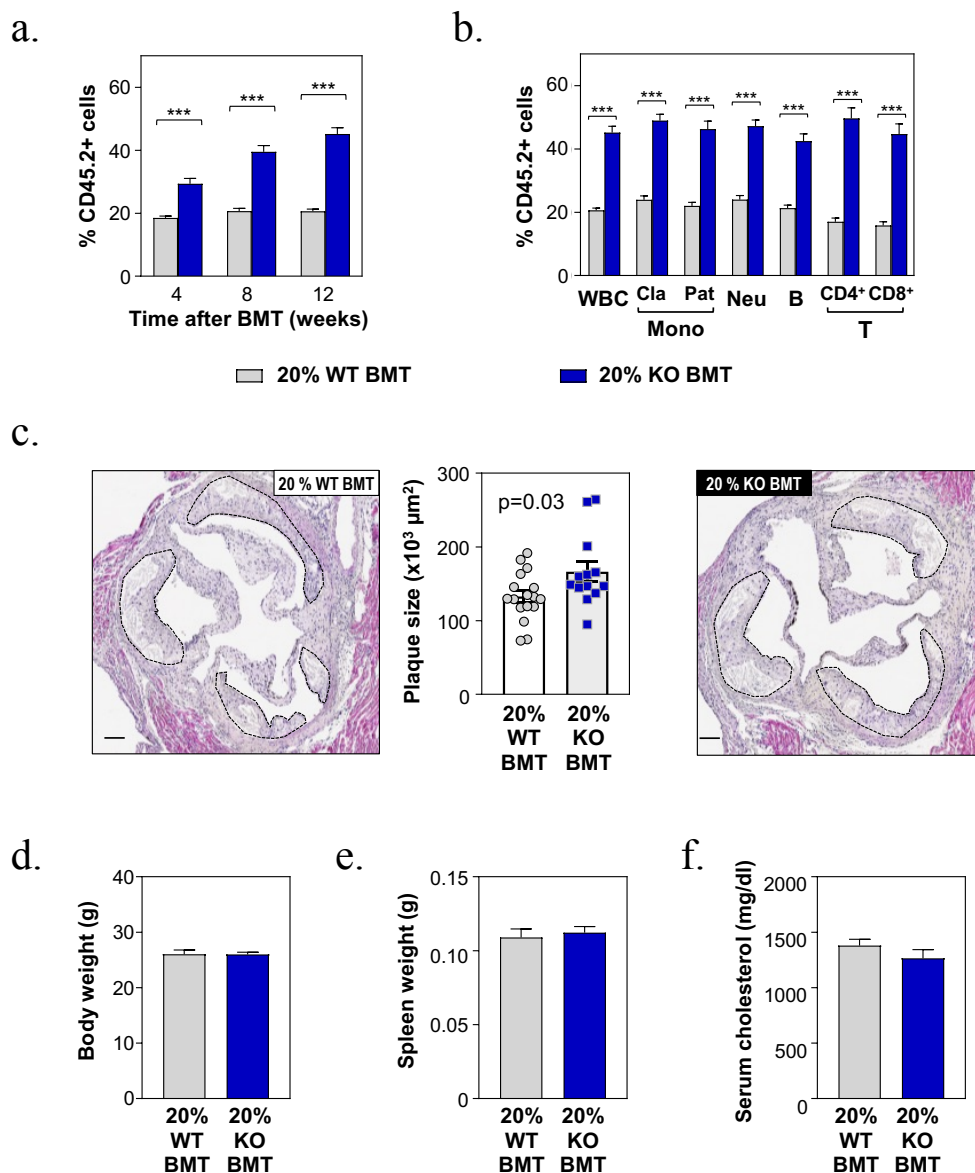

944  
945

946 **Supplementary Figure IX.** 20% KO-BMT female mice (n=13) and 20% WT-BMT controls  
947 (n=17) were fed a high-fat/high-cholesterol (HF/HC) diet for 9 weeks, starting 4 weeks after  
948 BMT. a) Percentage of CD45.2+ in white blood cells at different timepoints, evaluated by flow  
949 cytometry (\*\*p < 0.001). b) Percentage of CD45.2+ cells in different white blood cell (WBC)  
950 lineages in peripheral blood after 9 weeks on HF/HC diet (13 weeks post-BMT), evaluated by  
951 flow cytometry (\*\*p < 0.001). c) Aortic root plaque size. Representative images of hematoxylin  
952 and eosin-stained sections are shown; atherosclerotic plaques are delineated by dashed lines.  
953 Scale bars, 100  $\mu$ m. d) Body weight. e) Spleen weight. f) Total cholesterol level in serum,  
954 evaluated by enzymatic methods.



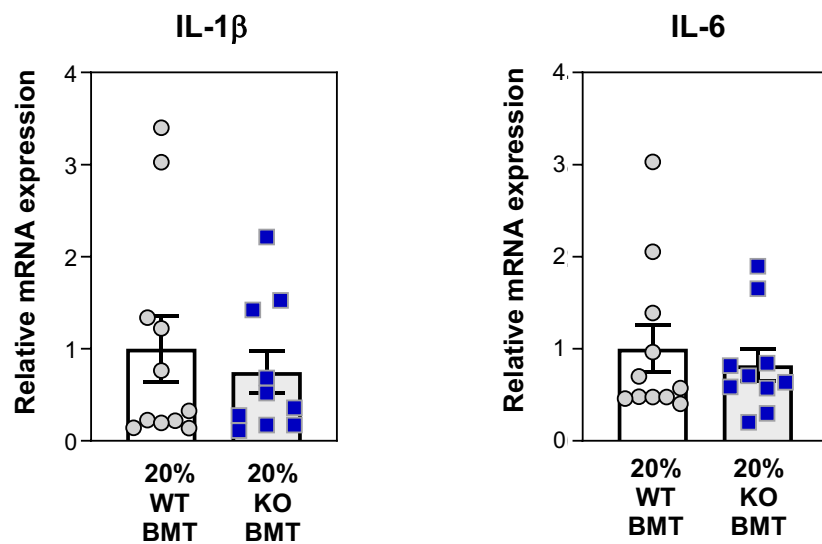

955  
956  
957  
958  
959  
960  
961  
962  
963  
964  
965  
966  
967  
968  
969  
970  
971  
972  
973  
974  
975  
976  
977  
978  
979  
980  
981  
982  
983  
984  
985  
986

**Supplementary Figure X.** Aortic arch samples were obtained from HF/HC-fed 20% WT-BMT mice (n=11) or 20% KO-BMT mice (n=10) and gene expression was analyzed by qPCR analysis.

987

### Sources:

- 988 1. Conte MS, Bradbury AW, Kolh P, White JV, Dick F, Fitridge R, Mills JL, Ricco JB,  
989 Suresh KR and Murad MH. Global vascular guidelines on the management of chronic limb-  
990 threatening ischemia. *J Vasc Surg*. 2019;69:3S-125S.e40.
- 991 2. Jaiswal S, Fontanillas P, Flannick J, Manning A, Grauman PV, Mar BG, Lindsley RC,  
992 Mermel CH, Burt N, Chavez A, et al. Age-Related Clonal Hematopoiesis Associated with  
993 Adverse Outcomes. *New England Journal of Medicine*. 2014;371:2488-2498.
- 994 3. Jaiswal S, Natarajan P, Silver AJ, Gibson CJ, Bick AG, Shvartz E, McConkey M, Gupta  
995 N, Gabriel S, Ardissino D, et al. Clonal Hematopoiesis and Risk of Atherosclerotic  
996 Cardiovascular Disease. *New England Journal of Medicine*. 2017;377:111-121.
- 997 4. Xie M, Lu C, Wang J, McLellan MD, Johnson KJ, Wendl MC, McMichael JF, Schmidt  
998 HK, Yellapantula V, Miller CA, et al. Age-related mutations associated with clonal  
999 hematopoietic expansion and malignancies. *Nature medicine*. 2014;20:1472-8.
- 1000 5. Genovese G, Kähler AK, Handsaker RE, Lindberg J, Rose SA, Bakhoum SF, Chambert  
1001 K, Mick E, Neale BM, Fromer M, et al. Clonal hematopoiesis and blood-cancer risk inferred  
1002 from blood DNA sequence. *N Engl J Med*. 2014;371:2477-87.
- 1003 6. Bick AG, Pirruccello JP, Griffin GK, Gupta N, Gabriel S, Saleheen D, Libby P,  
1004 Kathiresan S and Natarajan P. Genetic Interleukin 6 Signaling Deficiency Attenuates  
1005 Cardiovascular Risk in Clonal Hematopoiesis. *Circulation*. 2020;141:124-131.
- 1006 7. Bycroft C, Freeman C, Petkova D, Band G, Elliott LT, Sharp K, Motyer A, Vukcevic D,  
1007 Delaneau O, O'Connell J, et al. The UK Biobank resource with deep phenotyping and genomic  
1008 data. *Nature*. 2018;562:203-209.
- 1009 8. Smoller JW, Karlson EW, Green RC, Kathiresan S, MacArthur DG, Talkowski ME,  
1010 Murphy SN and Weiss ST. An eMERGE Clinical Center at Partners Personalized Medicine.  
1011 *Journal of personalized medicine*. 2016;6.
- 1012 9. Van Hout CV, Tachmazidou I, Backman JD, Hoffman JD, Liu D, Pandey AK, Gonzaga-  
1013 Jauregui C, Khalid S, Ye B, Banerjee N, et al. Exome sequencing and characterization of 49,960  
1014 individuals in the UK Biobank. *Nature*. 2020;586:749-756.
- 1015 10. Bick AG, Weinstock JS, Nandakumar SK, Fulco CP, Bao EL, Zekavat SM, Szeto MD,  
1016 Liao X, Leventhal MJ, Nasser J, et al. Inherited causes of clonal haematopoiesis in 97,691 whole  
1017 genomes. *Nature*. 2020;586:763-768.
- 1018 11. Jaiswal S, Fontanillas P, Flannick J, Manning A, Grauman PV, Mar BG, Lindsley RC,  
1019 Mermel CH, Burt N, Chavez A, et al. Age-related clonal hematopoiesis associated with adverse  
1020 outcomes. *N Engl J Med*. 2014;371:2488-98.
- 1021 12. Jaiswal S, Natarajan P, Silver AJ, Gibson CJ, Bick AG, Shvartz E, McConkey M, Gupta  
1022 N, Gabriel S, Ardissino D, et al. Clonal Hematopoiesis and Risk of Atherosclerotic  
1023 Cardiovascular Disease. *N Engl J Med*. 2017;377:111-121.
- 1024 13. Klarin D, Lynch J, Aragam K, Chaffin M, Assimes TL, Huang J, Lee KM, Shao Q,  
1025 Huffman JE, Natarajan P, et al. Genome-wide association study of peripheral artery disease in  
1026 the Million Veteran Program. *Nature medicine*. 2019;25:1274-1279.
- 1027 14. Wu P, Gifford A, Meng X, Li X, Campbell H, Varley T, Zhao J, Carroll R, Bastarache L,  
1028 Denny JC, et al. Mapping ICD-10 and ICD-10-CM Codes to Phecodes: Workflow Development  
1029 and Initial Evaluation. *JMIR Med Inform*. 2019;7:e14325.

- 1030 15. Zekavat SM, Lin S-H, Bick AG, Liu A, Paruchuri K, Uddin MM, Ye Y, Yu Z, Liu X,  
1031 Kamatani Y, et al. Hematopoietic mosaic chromosomal alterations and risk for infection among  
1032 767,891 individuals without blood cancer. *medRxiv*. 2020:2020.11.12.20230821.
- 1033 16. Hernan MA, Brumback B and Robins JM. Marginal structural models to estimate the  
1034 causal effect of zidovudine on the survival of HIV-positive men. *Epidemiology*. 2000;11:561-70.
- 1035 17. Fuster JJ, MacLauchlan S, Zuriaga MA, Polackal MN, Ostriker AC, Chakraborty R, Wu  
1036 CL, Sano S, Muralidharan S, Rius C, et al. Clonal hematopoiesis associated with TET2  
1037 deficiency accelerates atherosclerosis development in mice. *Science (New York, NY)*.  
1038 2017;355:842-847.
- 1039 18. Fuster JJ, Zuriaga MA, Zorita V, MacLauchlan S, Polackal MN, Viana-Huete V, Ferrer-  
1040 Pérez A, Matesanz N, Herrero-Cervera A, Sano S, et al. TET2-Loss-of-Function-Driven Clonal  
1041 Hematopoiesis Exacerbates Experimental Insulin Resistance in Aging and Obesity. *Cell reports*.  
1042 2020;33:108326.
- 1043 19. Denny JC, Bastarache L, Ritchie MD, Carroll RJ, Zink R, Mosley JD, Field JR, Pulley  
1044 JM, Ramirez AH, Bowton E, et al. Systematic comparison of phenome-wide association study of  
1045 electronic medical record data and genome-wide association study data. *Nat Biotechnol*.  
1046 2013;31:1102-10.
- 1047 20. Visconte V, M ON and H JR. Mutations in Splicing Factor Genes in Myeloid  
1048 Malignancies: Significance and Impact on Clinical Features. *Cancers (Basel)*. 2019;11.
- 1049 21. Bondar T and Medzhitov R. p53-mediated hematopoietic stem and progenitor cell  
1050 competition. *Cell Stem Cell*. 2010;6:309-22.
- 1051 22. Liu Y, Elf SE, Miyata Y, Sashida G, Liu Y, Huang G, Di Giandomenico S, Lee JM,  
1052 Deblasio A, Menendez S, et al. p53 regulates hematopoietic stem cell quiescence. *Cell Stem Cell*.  
1053 2009;4:37-48.
- 1054 23. TeKippe M, Harrison DE and Chen J. Expansion of hematopoietic stem cell phenotype  
1055 and activity in Trp53-null mice. *Exp Hematol*. 2003;31:521-7.
- 1056 24. Sano S, Oshima K, Wang Y, MacLauchlan S, Katanasaka Y, Sano M, Zuriaga MA,  
1057 Yoshiyama M, Goukassian D, Cooper MA, et al. Tet2-Mediated Clonal Hematopoiesis  
1058 Accelerates Heart Failure Through a Mechanism Involving the IL-1beta/NLRP3 Inflammasome.  
1059 *J Am Coll Cardiol*. 2018;71:875-886.
- 1060 25. Abplanalp WT, Cremer S, John D, Hoffmann J, Schuhmacher B, Merten M, Rieger MA,  
1061 Vasa-Nicotera M, Zeiher AM and Dimmeler S. Clonal Hematopoiesis-Driver DNMT3A  
1062 Mutations Alter Immune Cells in Heart Failure. *Circ Res*. 2021;128:216-228.
- 1063 26. Sinha SK, Miikeda A, Fouladian Z, Mehrabian M, Edillor C, Shih D, Zhou Z, Paul MK,  
1064 Charugundla S, Davis RC, et al. Local M-CSF (Macrophage Colony-Stimulating Factor)  
1065 Expression Regulates Macrophage Proliferation and Apoptosis in Atherosclerosis. *Arterioscler  
1066 Thromb Vasc Biol*. 2021;41:220-233.
- 1067 27. Klarin D, Verma SS, Judy R, Dikilitas O, Wolford BN, Paranjpe I, Levin MG, Pan C,  
1068 Tcheandjieu C, Spin JM, et al. Genetic Architecture of Abdominal Aortic Aneurysm in the  
1069 Million Veteran Program. *Circulation*. 2020.
- 1070 28. Shimizu K, Mitchell RN and Libby P. Inflammation and cellular immune responses in  
1071 abdominal aortic aneurysms. *Arterioscler Thromb Vasc Biol*. 2006;26:987-94.
- 1072 29. Boesten LS, Zadelaar AS, van Nieuwkoop A, Hu L, Teunisse AF, Jochemsen AG, Evers  
1073 B, van de Water B, Gijbels MJ, van Vlijmen BJ, et al. Macrophage p53 controls macrophage  
1074 death in atherosclerotic lesions of apolipoprotein E deficient mice. *Atherosclerosis*.  
1075 2009;207:399-404.

- 1076 30. Fuster JJ, Fernandez P, Gonzalez-Navarro H, Silvestre C, Nabah YN and Andres V.  
1077 Control of cell proliferation in atherosclerosis: insights from animal models and human studies.  
1078 *Cardiovasc Res.* 2010;86:254-64.
- 1079 31. Guevara NV, Kim HS, Antonova EI and Chan L. The absence of p53 accelerates  
1080 atherosclerosis by increasing cell proliferation in vivo. *Nat Med.* 1999;5:335-9.
- 1081 32. Mercer J, Figg N, Stoneman V, Braganza D and Bennett MR. Endogenous p53 protects  
1082 vascular smooth muscle cells from apoptosis and reduces atherosclerosis in ApoE knockout  
1083 mice. *Circ Res.* 2005;96:667-74.
- 1084 33. Merched AJ, Williams E and Chan L. Macrophage-specific p53 expression plays a  
1085 crucial role in atherosclerosis development and plaque remodeling. *Arterioscler Thromb Vasc*  
1086 *Biol.* 2003;23:1608-14.
- 1087 34. Sanz-Gonzalez SM, Barquin L, Garcia-Cao I, Roque M, Gonzalez JM, Fuster JJ, Castells  
1088 MT, Flores JM, Serrano M and Andres V. Increased p53 gene dosage reduces neointimal  
1089 thickening induced by mechanical injury but has no effect on native atherosclerosis. *Cardiovasc*  
1090 *Res.* 2007;75:803-12.
- 1091 35. van Vlijmen BJ, Gerritsen G, Franken AL, Boesten LS, Kockx MM, Gijbels MJ,  
1092 Vierboom MP, van Eck M, van De Water B, van Berkel TJ, et al. Macrophage p53 deficiency  
1093 leads to enhanced atherosclerosis in APOE\*3-Leiden transgenic mice. *Circ Res.* 2001;88:780-6.
- 1094 36. Robbins CS, Hilgendorf I, Weber GF, Theurl I, Iwamoto Y, Figueiredo JL, Gorbato R,  
1095 Sukhova GK, Gerhardt LM, Smyth D, et al. Local proliferation dominates lesional macrophage  
1096 accumulation in atherosclerosis. *Nat Med.* 2013;19:1166-72.
- 1097 37. Heyde A, Rohde D, McAlpine CS, Zhang S, Hoyer FF, Gerold JM, Cheek D, Iwamoto  
1098 Y, Schloss MJ, Vandoorne K, et al. Increased stem cell proliferation in atherosclerosis  
1099 accelerates clonal hematopoiesis. *Cell.* 2021;184:1348-1361 e22.
- 1100 38. Fidler TP, Xue C, Yalcinkaya M, Hardaway B, Abramowicz S, Xiao T, Liu W, Thomas  
1101 DG, Hajebrahimi MA, Pircher J, et al. The AIM2 inflammasome exacerbates atherosclerosis in  
1102 clonal haematopoiesis. *Nature.* 2021;592:296-301.
- 1103
